# Supplementary material for: Therapeutic effects of anodal transcranial direct current stimulation in a rat model of ADHD
Source: eLife. 2020 Sep 21;9:e56359. doi: 10.7554/eLife.56359 (PMC7535928; doi:10.7554/eLife.56359)
Supplement: Figure 4—source data 1. — This file contains all source data for BDNF and its activated receptor shown in Figure 4. [file elife-56359-fig4-data1.xlsx]

## Sheet: Figure 4E
Figure 4E : Number of cells in the mPFC
Summary Statistics (arithmetic from Sigma Plot 11)
mBDNF
Normality Test (Shapiro-Wilk): Passed (P = 0.397)
Equal Variance Test: Passed (P = 0.119)
Source of Variation	DF	SS	MS	F	P
Between Groups	2	57734.9	28867.5	17.827	<0.001
Residual	12	19432	1619.33
Total	14	77166.9
Group		Total n	Mean	SD	SE	C.I. of Mean (95%conf)	Median	0.25	0.75
Sham		5	134	15.05	6.731	18.687	130	121.25	147.25
tDCS-PFC		5	283.2	54.861	24.534	68.119	289	245.5	331.25
MPH		5	233.6	40.272	18.01	50.004	245	206.5	256.75
Source Data
Sham	Number	Number of cells			tDCS-PFC	Number	Number of cells			MPH	Number	Number of cells
	1	130				1	202				1	217
	2	154				2	330				2	283
	3	122				3	289				3	245
	4	119				4	335				4	175
	5	145				5	260				5	248
pTrkB
Normality Test (Shapiro-Wilk): Passed (P = 0.587)
Equal Variance Test: Passed (P = 0.819)
Source of Variation	DF	SS	MS	F	P
Between Groups	2	69136.5	34568.3	55.806	<0.001
Residual	12	7433.2	619.433
Total	14	76569.7
Group		Total n	Mean	SD	SE	C.I. of Mean (95%conf)	Median	0.25	0.75
Sham		5	145	23.292	10.416	28.92	134	130.25	159
tDCS-PFC		5	311	29.453	13.172	36.571	309	295.25	337.25
MPH		5	219.4	21.173	9.469	26.29	211	204.75	235.25
Source Data
Sham	Number	Number of cells			tDCS-PFC	Number	Number of cells			MPH	Number	Number of cells
	1	151				1	266				1	207
	2	183				2	338				2	230
	3	134				3	337				3	211
	4	132				4	309				4	198
	5	125				5	305				5	251
mBDNF/pTrkB
Normality Test (Shapiro-Wilk): Passed (P = 0.589)
Equal Variance Test: Passed (P = 0.152)
Source of Variation	DF	SS	MS	F	P
Between Groups	2	45544.5	22772.3	15.605	<0.001
Residual	12	17511.2	1459.27
Total	14	63055.7
Group		Total n	Mean	SD	SE	C.I. of Mean (95%conf)	Median	0.25	0.75
Sham		5	84.4	8.562	3.829	10.631	83	79.5	92.25
tDCS-PFC		5	216.4	38.953	17.42	48.366	231	178.5	249.75
MPH		5	174.8	52.794	23.61	65.552	145	134.75	228.5
Source Data
Sham	Number	Number of cells			tDCS-PFC	Number	Number of cells			MPH	Number	Number of cells
	1	93				1	168				1	137
	2	92				2	252				2	225
	3	72				3	231				3	128
	4	82				4	249				4	145
	5	83				5	182				5	239

## Sheet: Figure 4F
Figure 4F : Number of cells in the striatum
Summary Statistics (arithmetic from Sigma Plot 11)
Dorsal striatum
mBDNF
Normality Test (Shapiro-Wilk): Passed (P = 0.365)
Equal Variance Test: Passed (P = 0.508)
Source of Variation	DF	SS	MS	F	P
Between Groups	2	24697.7	12348.9	15.951	<0.001
Residual	12	9290	774.167
Total	14	33987.7
Group		Total n	Mean	SD	SE	C.I. of Mean (95%conf)	Median	0.25	0.75
Sham		5	134	28.411	12.706	35.277	98	81	128.25
tDCS-PFC		5	283.2	22.672	10.139	28.15	201	190	216.75
MPH		5	233.6	31.643	14.151	39.29	141	110.75	161.5
Source Data
Sham	Number	Number of cells			tDCS-PFC	Number	Number of cells			MPH	Number	Number of cells
	1	98				1	201				1	184
	2	84				2	212				2	154
	3	72				3	197				3	141
	4	124				4	231				4	112
	5	141				5	169				5	107
pTrkB
Normality Test (Shapiro-Wilk): Passed (P = 0.410)
Equal Variance Test: Passed (P = 0.779)
Source of Variation	DF	SS	MS	F	P
Between Groups	2	24828.9	12414.5	17.25	<0.001
Residual	12	8636.4	719.7
Total	14	33465.3
Group		Total n	Mean	SD	SE	C.I. of Mean (95%conf)	Median	0.25	0.75
Sham		5	159	28.662	12.818	35.588	156	137.75	173.5
tDCS-PFC		5	251.6	17.038	7.62	21.156	254	236.25	265.25
MPH		5	173.4	32.362	14.473	40.183	171	157.25	185.75
Source Data
Sham	Number	Number of cells			tDCS-PFC	Number	Number of cells			MPH	Number	Number of cells
	1	140				1	272				1	224
	2	156				2	254				2	171
	3	163				3	238				3	173
	4	131				4	263				4	134
	5	205				5	231				5	165
mBDNF/pTrkB
Normality Test (Shapiro-Wilk): Passed (P = 0.487)
Equal Variance Test: Passed (P = 0.515)
Source of Variation	DF	SS	MS	F	P
Between Groups	2	16534.9	8267.47	20.562	<0.001
Residual	12	4824.8	402.067
Total	14	21359.7
Group		Total n	Mean	SD	SE	C.I. of Mean (95%conf)	Median	0.25	0.75
Sham		5	58.8	15.515	6.938	19.264	55	50	70.75
tDCS-PFC		5	139.6	22.39	10.013	27.801	136	120.75	161.25
MPH		5	107.2	21.545	9.635	26.752	104	94	122
Source Data
Sham	Number	Number of cells			tDCS-PFC	Number	Number of cells			MPH	Number	Number of cells
	1	54				1	165				1	104
	2	55				2	114				2	117
	3	38				3	123				3	137
	4	68				4	160				4	99
	5	79				5	136				5	79
Ventral striatum
mBDNF
Normality Test (Shapiro-Wilk): Passed (P = 0.084)
Equal Variance Test: Passed (P = 0.435)
Source of Variation	DF	SS	MS	F	P
Between Groups	2	18054.4	9027.2	28.26	<0.001
Residual	12	3833.2	319.433
Total	14	21887.6
Group		Total n	Mean	SD	SE	C.I. of Mean (95%conf)	Median	0.25	0.75
Sham		5	77.6	18.243	8.158	22.651	81	61	92.75
tDCS-PFC		5	162.4	14.656	6.554	18.198	164	150.5	170.5
MPH		5	124.8	20.266	9.063	25.163	130	104.25	142.75
Source Data
Sham	Number	Number of cells			tDCS-PFC	Number	Number of cells			MPH	Number	Number of cells
	1	63				1	152				1	130
	2	55				2	166				2	102
	3	91				3	164				3	142
	4	81				4	146				4	145
	5	98				5	184				5	105
pTrkB
Normality Test (Shapiro-Wilk): Passed (P = 0.706)
Equal Variance Test: Passed (P = 0.271)
Source of Variation	DF	SS	MS	F	P
Between Groups	2	22313.2	11156.6	22.552	<0.001
Residual	12	5936.4	494.7
Total	14	28249.6
Group		Total n	Mean	SD	SE	C.I. of Mean (95%conf)	Median	0.25	0.75
Sham		5	94.2	7.12	3.184	8.841	97	91	99
tDCS-PFC		5	180.8	25.094	11.222	31.158	190	156.25	199.25
MPH		5	170.2	28.35	12.678	35.201	165	156.75	180.75
Source Data
Sham	Number	Number of cells			tDCS-PFC	Number	Number of cells			MPH	Number	Number of cells
	1	99				1	158				1	138
	2	82				2	196				2	163
	3	94				3	190				3	216
	4	97				4	151				4	165
	5	99				5	209				5	169
mBDNF/pTrkB
Normality Test (Shapiro-Wilk): Passed (P = 0.394)
Equal Variance Test: Passed (P = 0.635)
Source of Variation	DF	SS	MS	F	P
Between Groups	2	13340.1	6670.07	23.163	<0.001
Residual	12	3455.6	287.967
Total	14	16795.7
Group		Total n	Mean	SD	SE	C.I. of Mean (95%conf)	Median	0.25	0.75
Sham		5	64.2	16.438	7.351	20.41	58	50	79.25
tDCS-PFC		5	137.2	21.833	9.764	27.11	146	125	152.5
MPH		5	103	10.817	4.837	13.431	102	96.75	112.5
Source Data
Sham	Number	Number of cells			tDCS-PFC	Number	Number of cells			MPH	Number	Number of cells
	1	58				1	146				1	102
	2	50				2	101				2	114
	3	77				3	154				3	112
	4	50				4	133				4	100
	5	86				5	152				5	87

## Sheet: Figure 4G
Figure 4G : Number of cells in the dosal hippocampus (CA1)
Summary Statistics (arithmetic from Sigma Plot 11)
mBDNF
Normality Test (Shapiro-Wilk): Passed (P = 0.413)
Equal Variance Test: Passed (P = 0.220)
Source of Variation	DF	SS	MS	F	P
Between Groups	2	5333.2	2666.6	9.376	0.004
Residual	12	3412.8	284.4
Total	14	8746
Group		Total n	Mean	SD	SE	C.I. of Mean (95%conf)	Median	0.25	0.75
Sham		5	38.6	5.177	2.315	6.428	40	36	42.25
tDCS-PFC		5	82.2	23.983	10.726	29.779	74	66	96.25
MPH		5	47.2	15.849	7.088	19.679	51	36.5	59.25
Source Data
Sham	Number	Number of cells			tDCS-PFC	Number	Number of cells			MPH	Number	Number of cells
	1	42				1	60				1	23
	2	43				2	68				2	63
	3	40				3	74				3	51
	4	30				4	121				4	41
	5	38				5	88				5	58
pTrkB
Normality Test (Shapiro-Wilk): Passed (P = 0.140)
Equal Variance Test: Passed (P = 0.258)
Source of Variation	DF	SS	MS	F	P
Between Groups	2	2403.73	1201.87	5.32	0.022
Residual	12	2711.2	225.933
Total	14	5114.93
Group		Total n	Mean	SD	SE	C.I. of Mean (95%conf)	Median	0.25	0.75
Sham		5	64.8	9.094	4.067	11.292	63	59.5	72.75
tDCS-PFC		5	94.4	23.458	10.491	29.128	88	81	106.5
MPH		5	71.6	6.693	2.993	8.311	73	66	76.25
Source Data
Sham	Number	Number of cells			tDCS-PFC	Number	Number of cells			MPH	Number	Number of cells
	1	62				1	69				1	67
	2	52				2	85				2	73
	3	75				3	88				3	63
	4	63				4	132				4	75
	5	72				5	98				5	80
mBDNF/pTrkB
Normality Test (Shapiro-Wilk): Passed (P = 0.514)
Equal Variance Test: Passed (P = 0.527)
Source of Variation	DF	SS	MS	F	P
Between Groups	2	5947.6	2973.8	15.245	<0.001
Residual	12	2340.8	195.067
Total	14	8288.4
Group		Total n	Mean	SD	SE	C.I. of Mean (95%conf)	Median	0.25	0.75
Sham		5	32.8	7.662	3.426	9.513	38	25.25	38.25
tDCS-PFC		5	72.2	19.331	8.645	24.003	68	56.75	86
MPH		5	27.6	12.361	5.528	15.348	20	18.5	40
Source Data
Sham	Number	Number of cells			tDCS-PFC	Number	Number of cells			MPH	Number	Number of cells
	1	39				1	58				1	19
	2	38				2	53				2	17
	3	38				3	68				3	20
	4	26				4	101				4	39
	5	23				5	81				5	43

## Sheet: Figure 4H
Figure 4H : Number of cells in the SN/VTA
Summary Statistics (arithmetic from Sigma Plot 11)
Substantia nigra
mBDNF
Normality Test (Shapiro-Wilk): Passed (P = 0.131)
Equal Variance Test: Passed (P = 0.761)
Source of Variation	DF	SS	MS	F	P
Between Groups	2	917.733	458.867	1.697	0.224
Residual	12	3244	270.333
Total	14	4161.73
Group		Total n	Mean	SD	SE	C.I. of Mean (95%conf)	Median	0.25	0.75
Sham		5	60.8	15.865	7.095	19.699	57	53	66.75
tDCS-PFC		5	79.6	20.132	9.003	24.997	68	65.75	96.25
MPH		5	67	12.41	5.55	15.409	68	55.75	78.5
Source Data
Sham	Number	Number of cells			tDCS-PFC	Number	Number of cells			MPH	Number	Number of cells
	1	44				1	67				1	80
	2	60				2	92				2	78
	3	56				3	62				3	68
	4	57				4	109				4	57
	5	87				5	68				5	52
pTrkB
Normality Test (Shapiro-Wilk): Failed (P < 0.050)
Group		Total n	Mean	SD	SE	C.I. of Mean (95%conf)	Median	0.25	0.75
Sham		5	76.8	12.398	5.544	15.394	82	70.25	85.25
tDCS-PFC		5	87	14.353	6.419	17.821	88	79.75	98.5
MPH		5	61.6	14.741	6.592	18.303	66	46.5	74.5
Source Data
Sham	Number	Number of cells			tDCS-PFC	Number	Number of cells			MPH	Number	Number of cells
	1	82				1	85				1	66
	2	75				2	88				2	74
	3	56				3	64				3	76
	4	85				4	100				4	45
	5	86				5	98				5	47
mBDNF/pTrkB
Normality Test (Shapiro-Wilk): Passed (P = 0.990)
Equal Variance Test: Passed (P = 0.657)
Source of Variation	DF	SS	MS	F	P
Between Groups	2	1427.73	713.867	8.227	0.006
Residual	12	1041.2	86.767
Total	14	2468.93
Group		Total n	Mean	SD	SE	C.I. of Mean (95%conf)	Median	0.25	0.75
Sham		5	26.4	7.092	3.172	8.806	27	22	31.25
tDCS-PFC		5	49.2	10.474	4.684	13.005	52	40.25	57.75
MPH		5	31.6	10.015	4.479	12.435	29	25	36.75
Source Data
Sham	Number	Number of cells			tDCS-PFC	Number	Number of cells			MPH	Number	Number of cells
	1	27				1	35				1	48
	2	16				2	57				2	22
	3	35				3	42				3	33
	4	24				4	52				4	29
	5	30				5	60				5	26
Ventral tengmental area
mBDNF
Normality Test (Shapiro-Wilk): Passed (P = 0.861)
Equal Variance Test: Passed (P = 0.657)
Source of Variation	DF	SS	MS	F	P
Between Groups	2	15448.1	7724.07	27.217	<0.001
Residual	12	3405.6	283.8
Total	14	18853.7
Group		Total n	Mean	SD	SE	C.I. of Mean (95%conf)	Median	0.25	0.75
Sham		5	45.2	14.738	6.591	18.299	38	34.5	60.5
tDCS-PFC		5	122.2	14.822	6.629	18.404	125	114.25	129.75
MPH		5	70	20.359	9.105	25.279	73	52.75	83
Source Data
Sham	Number	Number of cells			tDCS-PFC	Number	Number of cells			MPH	Number	Number of cells
	1	30				1	100				1	55
	2	36				2	119				2	73
	3	38				3	125				3	98
	4	60				4	141				4	78
	5	62				5	126				5	46
pTrkB
Normality Test (Shapiro-Wilk): Passed (P = 0.994)
Equal Variance Test: Passed (P = 0.748)
Source of Variation	DF	SS	MS	F	P
Between Groups	2	11100.1	5550.07	12.689	0.001
Residual	12	5248.8	437.4
Total	14	16348.9
Group		Total n	Mean	SD	SE	C.I. of Mean (95%conf)	Median	0.25	0.75
Sham		5	70.8	19.331	8.645	24.003	66	58.75	77.75
tDCS-PFC		5	116	18.641	8.337	23.146	120	103.75	128.75
MPH		5	51	24.31	10.872	30.185	60	32.25	69.5
Source Data
Sham	Number	Number of cells			tDCS-PFC	Number	Number of cells			MPH	Number	Number of cells
	1	60				1	88				1	38
	2	66				2	109				2	74
	3	69				3	126				3	68
	4	55				4	120				4	60
	5	104				5	137				5	15
mBDNF/pTrkB
Normality Test (Shapiro-Wilk): Passed (P = 0.479)
Equal Variance Test: Passed (P = 0.184)
Source of Variation	DF	SS	MS	F	P
Between Groups	2	14961.6	7480.8	21.925	<0.001
Residual	12	4094.4	341.2
Total	14	19056
Group		Total n	Mean	SD	SE	C.I. of Mean (95%conf)	Median	0.25	0.75
Sham		5	33.6	8.503	3.803	10.558	32	28.25	36.75
tDCS-PFC		5	104.4	20.744	9.277	25.757	114	85.75	121.25
MPH		5	42	22.825	10.208	28.342	42	27	61
Source Data
Sham	Number	Number of cells			tDCS-PFC	Number	Number of cells			MPH	Number	Number of cells
	1	26				1	76				1	33
	2	33				2	89				2	42
	3	32				3	114				3	67
	4	29				4	122				4	59
	5	48				5	121				5	9
