# Supplementary material for: Therapeutic effects of anodal transcranial direct current stimulation in a rat model of ADHD
Source: eLife. 2020 Sep 21;9:e56359. doi: 10.7554/eLife.56359 (PMC7535928; doi:10.7554/eLife.56359)
Supplement: Figure 5—source data 1. — This file contains all source data for BrdU- and BrdU/NeuN-double-positive cells analysis shown in Figure 5. [file elife-56359-fig5-data1.xlsx]

## Sheet: Sheet1
Figure 5B : Number of cells in the hippocampus
Summary Statistics (arithmetic from Sigma Plot 11)
BrdU
Normality Test (Shapiro-Wilk): Passed (P = 0.281)
Equal Variance Test: Passed (P = 0.898)
Source of Variation	DF	SS	MS	F	P
Between Groups	2	1416.93	708.467	2.685	0.109
Residual	12	3166	263.833
Total	14	4582.93
Group		Total n	Mean	SD	SE	C.I. of Mean (95%conf)	Median	0.25	0.75
Sham		5	37.2	18.512	8.279	22.986	29	25	54.75
tDCS-PFC		5	61	14.866	6.648	18.459	52	51.5	70.75
MPH		5	49.6	15.093	6.75	18.74	53	39.75	59.5
Source Data
Sham	Number	Number of cells			tDCS-PFC	Number	Number of cells			MPH	Number	Number of cells
	1	53				1	52				1	44
	2	60				2	66				2	67
	3	29				3	52				3	53
	4	16				4	85				4	27
	5	28				5	50				5	57
BrdU/NeuN
Normality Test (Shapiro-Wilk): Failed (P < 0.050)
Group		Total n	Mean	SD	SE	C.I. of Mean (95%conf)	Median	0.25	0.75
Sham		5	6.6	4.278	1.913	5.312	5	4.5	8
tDCS-PFC		5	23.8	6.058	2.709	7.522	20	19.75	28.5
MPH		5	17.6	5.177	2.315	6.428	15	13.75	22
Source Data
Sham	Number	Number of cells			tDCS-PFC	Number	Number of cells			MPH	Number	Number of cells
	1	6				1	20				1	13
	2	14				2	27				2	25
	3	5				3	19				3	14
	4	5				4	33				4	15
	5	3				5	20				5	21
