# Supplementary material for: Therapeutic effects of anodal transcranial direct current stimulation in a rat model of ADHD
Source: eLife journal article supplement (doi:10.7554/elife.56359), 2020-09-21
Supplement: supp [file Figure 1-figure supplement 1A,C-E.xlsx]

## Sheet: Fig1-Suppl1A
Figure 1-Supplementary Figure1 A : Total distance in the open field test
Summary Statistics (arithmetic from Sigma Plot 11)
Normality Test (Shapiro-Wilk): passed (P = 0.841)
Equal Variance Test: Failed (P < 0.050)
Group		Total n	Mean	SD	SE	C.I. of Mean (95%conf)	Median	0.25	0.75
WKY		8	6620.66	1309.09	462.834	1094.43	6789.64	5685.96	7720.28
SHR		8	8510.96	532.871	188.398	445.491	8571.25	8071.51	8892.33
Sham		8	8324.47	585.487	207.001	489.48	8211.24	7874.68	8703.14
tDCS-PFC		8	7113.73	1346.77	476.154	1125.92	6908.78	5932.35	8250.01
tDCS-M1		8	7229.62	833.824	294.801	697.094	7184.93	6527.6	7970.71
MPH		8	7266.64	675.357	238.775	564.613	6969.17	6806.57	7621.61
Source Data
WKY	Number	Total distance (cm)			SHR	Number	Total distance (cm)			Sham	Number	Total distance (cm)
	1	5338.06				1	8170.58				1	7650.59
	2	4427.93				2	8655.21				2	7942.53
	3	7124.75				3	7719.28				3	7806.82
	4	6033.86				4	9298.22				4	8640.11
	5	6454.53				5	8999.6				5	9367.07
	6	8014.45				6	8785.05				6	8766.16
	7	8145.61				7	8487.28				7	7962
	8	7426.12				8	7972.44				8	8460.47
tDCS-PFC	Number	Total distance (cm)			tDCS-M1	Number	Total distance (cm)			MPH	Number	Total distance (cm)
	1	7695.66				1	7633.58				1	6825.1
	2	5883.04				2	6644.23				2	7647.3
	3	5981.67				3	6125.35				3	6666.12
	4	6123.03				4	7358.85				4	6936.78
	5	5742.1				5	7011.01				5	8672.24
	6	8804.37				6	6410.98				6	7001.56
	7	8985.41				7	8307.84				7	6788.05
	8	7694.54				8	8345.12				8	7595.93
Figure 1-Supplementary Figure1 A : Resting time in center zone in the open field test
Summary Statistics (arithmetic from Sigma Plot 11)
Normality Test (Shapiro-Wilk): Failed (P < 0.050)
Group		Total n	Mean	SD	SE	C.I. of Mean (95%conf)	Median	0.25	0.75
WKY		8	0.945	1.248	0.441	1.043	0.56	0	1.76
SHR		8	2.285	1.18	0.417	0.987	1.82	1.58	2.7
Sham		8	2.505	1.222	0.432	1.022	2.14	1.78	3.18
tDCS-PFC		8	2.615	0.922	0.326	0.771	2.48	1.94	2.82
tDCS-M1		8	2.385	1.014	0.358	0.848	2.3	1.42	3.22
MPH		8	2.235	1.399	0.495	1.169	2.46	0.92	3.34
Source Data
WKY	Number	Resting time (s)			SHR	Number	Resting time (s)			Sham	Number	Resting time (s)
	1	0.6				1	1.76				1	1.04
	2	2.92				2	3.12				2	4.8
	3	2.92				3	1.88				3	1.92
	4	0				4	4.84				4	2.36
	5	0				5	2.28				5	2.6
	6	0.56				6	1.56				6	1.92
	7	0.56				7	1.6				7	1.64
	8	0				8	1.24				8	3.76
tDCS-PFC	Number	Resting time (s)			tDCS-M1	Number	Resting time (s)			MPH	Number	Resting time (s)
	1	4.64				1	3.6				1	3.08
	2	2.72				2	2.16				2	2.36
	3	2.08				3	2.44				3	3.6
	4	1.8				4	3.92				4	2.56
	5	2.84				5	2.84				5	1.32
	6	2.8				6	1.28				6	0.32
	7	1.8				7	1.32				7	0.52
	8	2.24				8	1.52				8	4.12

## Sheet: Fig1-Suppl1C
Figure 1-Supplementary Figure1 D : Number of entery in the arms (n) in the Y-maze spontaneous alternation task
Summary Statistics (arithmetic from Sigma Plot 11)
Normality Test (Shapiro-Wilk): Passed (P = 0.577)
Equal Variance Test: Passed (P = 0.068)
Group		Total n	Mean	SD	SE	C.I. of Mean (95%conf)	Median	0.25	0.75
WKY		7	19.571	4.86	1.837	4.495	22	16	23
SHR		7	23.714	4.309	1.629	3.986	25	19.25	27.5
Sham		7	23	3.055	1.155	2.825	23	20.5	24.75
tDCS-PFC		7	22.571	2.507	0.948	2.319	22	21	24.75
tDCS-M1		7	23.857	1.574	0.595	1.455	24	22.25	25
MPH		7	24.571	1.988	0.751	1.839	25	23	26.5
Source Data
WKY	Number	Number of entery (n)			SHR	Number	Number of entery (n)			Sham	Number	Number of entery (n)
	1	23				1	19				1	23
	2	16				2	20				2	20
	3	16				3	26				3	24
	4	12				4	25				4	19
	5	25				5	19				5	22
	6	22				6	28				6	25
	7	23				7	29				7	28
tDCS-PFC	Number	Number of entery (n)			tDCS-M1	Number	Number of entery (n)			MPH	Number	Number of entery (n)
	1	21				1	22				1	27
	2	19				2	24				2	22
	3	22				3	26				3	23
	4	21				4	23				4	25
	5	25				5	25				5	23
	6	24				6	22				6	25
	7	26				7	25				7	27

## Sheet: Fig1-Suppl1E
Figure 1-Supplementary Figure1 E : Total distance in the object-place recognition test
Summary Statistics (arithmetic from Sigma Plot 11)
Training
Normality Test (Shapiro-Wilk): Passed (P = 0.621)
Equal Variance Test: Passed (P = 0.103)
Source of Variation	DF	SS	MS	F	P
Between Groups	5	496044	99208.8	0.342	0.884
Residual	42	1.21835e+07	290083
Total	47	1.26795e+07
Group		Total n	Mean	SD	SE	C.I. of Mean (95%conf)	Median	0.25	0.75
WKY		8	5925.8	732.348	258.924	612.258	5853.18	5303.72	6547.1
SHR		8	6120.49	702.662	248.429	587.44	6340.54	5391.74	6668.38
Sham		8	6074.73	480.178	169.769	401.439	6002.69	5774.31	6548.08
tDCS-PFC		8	5840.31	513.326	181.488	429.152	5728.38	5404.68	6278.9
tDCS-M1		8	5929.33	317.381	112.211	265.337	5902.1	5775.15	6136.72
MPH		8	5878.38	340.036	120.221	284.277	5943.99	5567.88	6134.33
Source Data
WKY	Number	Total distance (cm)			SHR	Number	Total distance (cm)			Sham	Number	Total distance (cm)
	1	4995.63				1	6975.76				1	5999.91
	2	5259.66				2	6842.88				2	6536.57
	3	5602.42				3	6349.12				3	6664.53
	4	5347.77				4	6493.88				4	6005.48
	5	7002.75				5	5264.19				5	6559.59
	6	6693.92				6	5186.84				6	5283.12
	7	6400.27				7	6331.96				7	5784.56
	8	6103.94				8	5519.29				8	5764.07
tDCS-PFC	Number	Total distance (cm)			tDCS-M1	Number	Total distance (cm)			MPH	Number	Total distance (cm)
	1	6652.9				1	6052.5				1	6249.72
	2	6404.47				2	5828.58				2	5990.87
	3	5731.35				3	6423.48				3	6339.34
	4	5725.4				4	5721.73				4	5395.27
	5	6153.33				5	5383.24				5	5565.49
	6	5334.94				6	5839.74				6	6018.94
	7	5474.41				7	6220.94				7	5570.26
	8	5245.66				8	5964.46				8	5897.11
Test
Normality Test (Shapiro-Wilk): passed (P = 0.484)
Equal Variance Test: Passed (P = 0.181)
Source of Variation	DF	SS	MS	F	P
Between Groups	5	1.05831e+06	211663	0.668	0.65
Residual	42	1.33073e+07	316841
Total	47	1.43656e+07
Group		Total n	Mean	SD	SE	C.I. of Mean (95%conf)	Median	0.25	0.75
WKY		8	5838.49	527.716	186.576	441.181	5657.9	5505.07	5946.87
SHR		8	5829.85	536.64	189.731	448.642	5890.06	5381.35	6345.86
Sham		8	6164.95	300.564	106.265	251.278	6157.41	5884.34	6431.31
tDCS-PFC		8	5743.72	786.146	277.945	657.235	5706.94	5043.7	6465.65
tDCS-M1		8	6034.77	582.18	205.832	486.715	5926.96	5677.81	6423.45
MPH		8	6048.66	535.984	189.499	448.094	6203.63	5680.29	6312.51
Source Data
WKY	Number	Total distance (cm)			SHR	Number	Total distance (cm)			Sham	Number	Total distance (cm)
	1	5446.15				1	6358.31				1	5943.86
	2	5510.99				2	6333.42				2	6530.58
	3	5499.16				3	6389.84				3	6389.82
	4	5709.43				4	5875.29				4	5842.93
	5	6070.31				5	5164.03				5	6472.8
	6	7042.05				6	5014.38				6	5863.85
	7	5606.38				7	5904.82				7	5904.82
	8	5823.43				8	5598.67				8	6370.96
tDCS-PFC	Number	Total distance (cm)			tDCS-M1	Number	Total distance (cm)			MPH	Number	Total distance (cm)
	1	6685.2				1	6165.54				1	6223.29
	2	6246.09				2	7010.59				2	6082.58
	3	6707.01				3	6681.36				3	6362.54
	4	6121.18				4	5610.48				4	6778.53
	5	4867.59				5	6026.1				5	5217.92
	6	5219.81				6	5211.17				6	6262.48
	7	4810.17				7	5745.13				7	5278
	8	5292.7				8	5827.82				8	6183.97
