# Supplementary material for: Therapeutic effects of anodal transcranial direct current stimulation in a rat model of ADHD
Source: eLife journal article supplement (doi:10.7554/elife.56359), 2020-09-21
Supplement: supp [file Figure 1-figure supplement 1B.xlsx]

## Sheet: Fig1-Suppl1B
Figure 1- Supplementary Figure 1 B: comparisons of total % correct choices in DNMTP T-maze
Summary Statistics (arithmetic from Sigma Plot 11)
Source Data
WKY		Session 1	Session 2	Session 3	Session 4	Session 5	Session 6	Session 7	Session 8	Session 9	Session 10
Number	1	70	60	60	70	66.6	80	80	80	71	80
	2	70	80	70	60	66.6	80	71	77	80	71
	3	80	80	70	80	71.4	85.7	83	80	71	71
	4	70	60	60	60	60	80	60	83	67	80
	5	70	80	66.6	70	70	66.6	70	80	70	80
	6	70	80	70	75	80	70	80	70	80	80
	7	70	70	80	60	80	70	80	80	80	70
	Mean	71.4286	72.8571	68.0857	67.8571	70.6571	76.0429	74.8571	78.5714	74.1429	76
SHR		Session 1	Session 2	Session 3	Session 4	Session 5	Session 6	Session 7	Session 8	Session 9	Session 10
Number	1	40	40	50	40	50	28.5	33	43	37	33
	2	40	20	20	40	55.5	33.3	40	33	33	43
	3	20	40	40	40	37.5	42.8	33	40	43	40
	4	40	20	40	40	50	40	33	40	40	40
	5	40	50	44.4	40	30	30	43	43	30	40
	6	40	40	37.5	22.2	20	20	40	40	30	20
	7	30	40	33.3	30	20	30	40	40	30	40
	Mean	35.7143	35.7143	37.8857	36.0286	37.5714	32.0857	37.4286	39.8571	34.7143	36.5714
Sham		Session 1	Session 2	Session 3	Session 4	Session 5	Session 6	Session 7	Session 8	Session 9	Session 10
Number	1	20	40	40	40	40	50	50	40	50	40
	2	40	40	40	40	50	33	43	40	40	50
	3	60	40	40	30	30	25	40	40	50	40
	4	40	40	60	50	20	40	43	40	40	50
	5	30	30	40	20	50	30	20	40	20	30
	6	50	30	50	25	30	30	30	40	40	40
	7	30	50	40	30	30	20	30	40	40	30
	Mean	38.5714	38.5714	44.2857	33.5714	35.7143	32.5714	36.5714	40	40	40
tDCS-PFC		Session 1	Session 2	Session 3	Session 4	Session 5	Session 6	Session 7	Session 8	Session 9	Session 10
Number	1	40	60	40	50	60	63	63	71	71	60
	2	40	60	60	60	60	71	56	60	67	75
	3	30	40	60	50	70	56	57	70	60	70
	4	30	60	50	60	70	71	63	67	60	71
	5	50	60	70	50	60	60	67	63	60	60
	6	60	60	57.1	66.6	60	60	63	60	70	70
	7	60	60	60	60	50	50	60	60	70	60
	Mean	44.2857	57.1429	56.7286	56.6571	61.4286	61.5714	61.2857	64.4286	65.4286	66.5714
tDCS-M1		Session 1	Session 2	Session 3	Session 4	Session 5	Session 6	Session 7	Session 8	Session 9	Session 10
Number	1	60	60	50	50	50	57	56	57	75	57
	2	40	60	60	50	50	50	57	71	50	67
	3	60	60	40	40	50	57	50	43	57	50
	4	60	20	60	60	37.5	67	60	50	57	50
	5	60	40	40	62.5	57.1	50	75	40	50	67
	6	50	50	50	50	40	60	40	50	60	60
	7	40	30	50	57.1	60	40	40	50	60	50
	Mean	52.8571	45.7143	50	52.8	49.2286	54.4286	54	51.5714	58.4286	57.2857
MPH		Session 1	Session 2	Session 3	Session 4	Session 5	Session 6	Session 7	Session 8	Session 9	Session 10
Number	1	60	60	60	60	50	50	63	67	50	70
	2	60	60	80	60	60	50	57	50	50	60
	3	60	40	70	50	60	60	67	57	67	60
	4	80	60	70	60	30	60	60	75	57	60
	5	40	60	37.5	50	50	60	50	67	67	50
	6	30	50	42.8	60	50	40	60	63	50	50
	7	30	50	50	40	60	50	50	60	50	60
	Mean	51.4286	54.2857	58.6143	54.2857	51.4286	52.8571	58.1429	62.7143	55.8571	58.5714

## Sheet: Sham vs tDCS-PFC
Figure 1- Supplementary Figure 1 B: comparisons of total % correct choices in DNMTP T-maze
Summary Statistics (arithmetic from Sigma Plot 11)
Sham vs. tDCS-PFC
Session 1
Normality Test (Shapiro-Wilk) Passed (P = 0.598)
Equal Variance Test: Passed (P = 1.000)
Source of Variation	DF	SS	MS	F	P
Between Groups	1	114.286	114.286	0.667	0.43
Residual	12	2057.14	171.429
Total	13	2171.43
Group		Total n	Mean	SD	SE	C.I. of Mean (95%conf)	Median	0.25	0.75
Sham		7	38.571	13.452	5.084	12.441	40	30	47.5
tDCS-PFC		7	44.286	12.724	4.809	11.768	40	32.5	57.5
Session 2
Normality Test (Shapiro-Wilk) Failed (P < 0.050)
Group		Total n	Mean	SD	SE	C.I. of Mean (95%conf)	Median	0.25	0.75
Sham		7	38.571	6.901	2.608	6.382	40	32.5	40
tDCS-PFC		7	57.143	7.559	2.857	6.991	60	60	60
Session 3
Normality Test (Shapiro-Wilk) Passed (P = 0.362)
Equal Variance Test: Passed (P = 0.522)
Source of Variation	DF	SS	MS	F	P
Between Groups	1	541.886	541.886	7.186	0.02
Residual	12	904.923	75.41
Total	13	1446.81
Group		Total n	Mean	SD	SE	C.I. of Mean (95%conf)	Median	0.25	0.75
Sham		7	44.286	7.868	2.974	7.277	40	40	47.5
tDCS-PFC		7	56.729	9.43	3.564	8.721	60	51.775	60
Session 4
Normality Test (Shapiro-Wilk) Passed (P = 0.692)
Equal Variance Test: Passed (P = 0.541)
Source of Variation	DF	SS	MS	F	P
Between Groups	1	1865.33	1865.33	24.842	<0.001
Residual	12	901.051	75.088
Total	13	2766.38
Group		Total n	Mean	SD	SE	C.I. of Mean (95%conf)	Median	0.25	0.75
Sham		7	33.571	10.293	3.891	9.52	30	26.25	40
tDCS-PFC		7	56.657	6.65	2.513	6.15	60	50	60
Session 5
Normality Test (Shapiro-Wilk) Passed (P = 0.492)
Equal Variance Test: Passed (P = 0.203)
Source of Variation	DF	SS	MS	F	P
Between Groups	1	2314.29	2314.29	26.27	<0.001
Residual	12	1057.14	88.095
Total	13	3371.43
Group		Total n	Mean	SD	SE	C.I. of Mean (95%conf)	Median	0.25	0.75
Sham		7	35.714	11.339	4.286	10.487	30	30	47.5
tDCS-PFC		7	61.429	6.901	2.608	6.382	60	60	67.5
Session 6
Normality Test (Shapiro-Wilk) Passed (P = 0.679)
Equal Variance Test: Passed (P = 0.614)
Source of Variation	DF	SS	MS	F	P
Between Groups	1	2943.5	2943.5	37.68	<0.001
Residual	12	937.429	78.119
Total	13	3880.93
Group		Total n	Mean	SD	SE	C.I. of Mean (95%conf)	Median	0.25	0.75
Sham		7	32.571	9.897	3.741	9.153	30	26.25	38.25
tDCS-PFC		7	61.571	7.635	2.886	7.061	60	57	69
Session 7
Normality Test (Shapiro-Wilk) Passed (P = 0.764)
Equal Variance Test: Passed (P = 0.222)
Source of Variation	DF	SS	MS	F	P
Between Groups	1	2137.79	2137.79	35.377	<0.001
Residual	12	725.143	60.429
Total	13	2862.93
Group		Total n	Mean	SD	SE	C.I. of Mean (95%conf)	Median	0.25	0.75
Sham		7	36.571	10.293	3.891	9.52	40	30	43
tDCS-PFC		7	61.286	3.861	1.459	3.571	63	57.75	63
Session 8
Normality Test (Shapiro-Wilk) Failed (P < 0.050)
Group		Total n	Mean	SD	SE	C.I. of Mean (95%conf)	Median	0.25	0.75
Sham		7	40	0	0	0	40	40	40
tDCS-PFC		7	64.429	4.86	1.837	4.495	63	60	69.25
Session 9
Normality Test (Shapiro-Wilk) Passed (P = 0.079)
Equal Variance Test: Failed (P < 0.050)
Group		Total n	Mean	SD	SE	C.I. of Mean (95%conf)	Median	0.25	0.75
Sham		7	40	10	3.78	9.248	40	40	47.5
tDCS-PFC		7	65.429	5.224	1.974	4.831	67	60	70
Session 10
Normality Test (Shapiro-Wilk) Passed (P = 0.201)
Equal Variance Test: Passed (P = 0.219)
Source of Variation	DF	SS	MS	F	P
Between Groups	1	2471.14	2471.14	46.067	<0.001
Residual	12	643.714	53.643
Total	13	3114.86
Group		Total n	Mean	SD	SE	C.I. of Mean (95%conf)	Median	0.25	0.75
Sham		7	40	8.165	3.086	7.551	40	32.5	47.5
tDCS-PFC		7	66.571	6.373	2.409	5.894	70	60	70.75
Source Data
Sham		Session 1	Session 2	Session 3	Session 4	Session 5	Session 6	Session 7	Session 8	Session 9	Session 10
Number	1	20	40	40	40	40	50	50	40	50	40
	2	40	40	40	40	50	33	43	40	40	50
	3	60	40	40	30	30	25	40	40	50	40
	4	40	40	60	50	20	40	43	40	40	50
	5	30	30	40	20	50	30	20	40	20	30
	6	50	30	50	25	30	30	30	40	40	40
	7	30	50	40	30	30	20	30	40	40	30
	Mean	38.5714	38.5714	44.2857	33.5714	35.7143	32.5714	36.5714	40	40	40
tDCS-PFC		Session 1	Session 2	Session 3	Session 4	Session 5	Session 6	Session 7	Session 8	Session 9	Session 10
Number	1	40	60	40	50	60	63	63	71	71	60
	2	40	60	60	60	60	71	56	60	67	75
	3	30	40	60	50	70	56	57	70	60	70
	4	30	60	50	60	70	71	63	67	60	71
	5	50	60	70	50	60	60	67	63	60	60
	6	60	60	57.1	66.6	60	60	63	60	70	70
	7	60	60	60	60	50	50	60	60	70	60
	Mean	44.2857	57.1429	56.7286	56.6571	61.4286	61.5714	61.2857	64.4286	65.4286	66.5714

## Sheet: Sham vs tDCS-M1
Figure 1- Supplementary Figure 1 B: comparisons of total % correct choices in DNMTP T-maze
Summary Statistics (arithmetic from Sigma Plot 11)
Sham vs. tDCS-M1
Session 1
Normality Test (Shapiro-Wilk) Passed (P = 0.682)
Equal Variance Test: Passed (P = 0.537)
Source of Variation	DF	SS	MS	F	P
Between Groups	1	714.286	714.286	5.263	0.041
Residual	12	1628.57	135.714
Total	13	2342.86
Group		Total n	Mean	SD	SE	C.I. of Mean (95%conf)	Median	0.25	0.75
Sham		7	38.571	13.452	5.084	12.441	40	30	47.5
tDCS-M1		7	52.857	9.512	3.595	8.797	60	42.5	60
Session 2
Normality Test (Shapiro-Wilk) Passed (P = 0.250)
Equal Variance Test: Passed (P = 0.351)
Source of Variation	DF	SS	MS	F	P
Between Groups	1	178.571	178.571	1.154	0.304
Residual	12	1857.14	154.762
Total	13	2035.71
Group		Total n	Mean	SD	SE	C.I. of Mean (95%conf)	Median	0.25	0.75
Sham		7	38.571	6.901	2.608	6.382	40	32.5	40
tDCS-M1		7	45.714	16.183	6.117	14.967	50	32.5	60
Session 3
Normality Test (Shapiro-Wilk) Passed (P = 0.126)
Equal Variance Test: Passed (P = 0.126)
Source of Variation	DF	SS	MS	F	P
Between Groups	1	114.286	114.286	1.778	0.207
Residual	12	771.429	64.286
Total	13	885.714
Group		Total n	Mean	SD	SE	C.I. of Mean (95%conf)	Median	0.25	0.75
Sham		7	44.286	7.868	2.974	7.277	40	40	47.5
tDCS-M1		7	50	8.165	3.086	7.551	50	42.5	57.5
Session 4
Normality Test (Shapiro-Wilk) :Passed (P = 0.587)
Equal Variance Test: Passed (P = 0.720)
Source of Variation	DF	SS	MS	F	P
Between Groups	1	1294.08	1294.08	15.726	0.002
Residual	12	987.494	82.291
Total	13	2281.58
Group		Total n	Mean	SD	SE	C.I. of Mean (95%conf)	Median	0.25	0.75
Sham		7	33.571	10.293	3.891	9.52	30	26.25	40
tDCS-M1		7	52.8	7.657	2.894	7.082	50	50	59.275
Session 5
Normality Test (Shapiro-Wilk) Passed (P = 0.622)
Equal Variance Test: Passed (P = 0.150)
Source of Variation	DF	SS	MS	F	P
Between Groups	1	639.226	639.226	6.534	0.025
Residual	12	1173.92	97.827
Total	13	1813.15
Group		Total n	Mean	SD	SE	C.I. of Mean (95%conf)	Median	0.25	0.75
Sham		7	35.714	11.339	4.286	10.487	30	30	47.5
tDCS-M1		7	49.229	8.19	3.096	7.575	50	42.5	55.325
Session 6
Normality Test (Shapiro-Wilk) Passed (P = 0.971)
Equal Variance Test: Passed (P = 0.837)
Source of Variation	DF	SS	MS	F	P
Between Groups	1	1672.07	1672.07	19.341	<0.001
Residual	12	1037.43	86.452
Total	13	2709.5
Group		Total n	Mean	SD	SE	C.I. of Mean (95%conf)	Median	0.25	0.75
Sham		7	32.571	9.897	3.741	9.153	30	26.25	38.25
tDCS-M1		7	54.429	8.658	3.272	8.007	57	50	59.25
Session 7
Normality Test (Shapiro-Wilk) Passed (P = 0.680)
Equal Variance Test: Passed (P = 0.808)
Source of Variation	DF	SS	MS	F	P
Between Groups	1	1063.14	1063.14	8.318	0.014
Residual	12	1533.71	127.81
Total	13	2596.86
Group		Total n	Mean	SD	SE	C.I. of Mean (95%conf)	Median	0.25	0.75
Sham		7	36.571	10.293	3.891	9.52	40	30	43
tDCS-M1		7	54	12.234	4.624	11.314	56	42.5	59.25
Session 8
Normality Test (Shapiro-Wilk) Failed (P < 0.050)
Group		Total n	Mean	SD	SE	C.I. of Mean (95%conf)	Median	0.25	0.75
Sham		7	40	0	0	0	40	40	40
tDCS-M1		7	51.571	10.179	3.847	9.414	50	44.75	55.25
Session 9
Normality Test (Shapiro-Wilk) Passed (P = 0.237)
Equal Variance Test: Passed (P = 0.240)
Source of Variation	DF	SS	MS	F	P
Between Groups	1	1188.64	1188.64	13.906	0.003
Residual	12	1025.71	85.476
Total	13	2214.36
Group		Total n	Mean	SD	SE	C.I. of Mean (95%conf)	Median	0.25	0.75
Sham		7	40	10	3.78	9.248	40	40	47.5
tDCS-M1		7	58.429	8.423	3.184	7.79	57	51.75	60
Session 10
Normality Test (Shapiro-Wilk) Failed (P < 0.050)
Group		Total n	Mean	SD	SE	C.I. of Mean (95%conf)	Median	0.25	0.75
Sham		7	40	8.165	3.086	7.551	40	32.5	47.5
tDCS-M1		7	57.286	7.697	2.909	7.118	57	50	65.25
Source Data
Sham		Session 1	Session 2	Session 3	Session 4	Session 5	Session 6	Session 7	Session 8	Session 9	Session 10
Number	1	20	40	40	40	40	50	50	40	50	40
	2	40	40	40	40	50	33	43	40	40	50
	3	60	40	40	30	30	25	40	40	50	40
	4	40	40	60	50	20	40	43	40	40	50
	5	30	30	40	20	50	30	20	40	20	30
	6	50	30	50	25	30	30	30	40	40	40
	7	30	50	40	30	30	20	30	40	40	30
	Mean	38.5714	38.5714	44.2857	33.5714	35.7143	32.5714	36.5714	40	40	40
tDCS-M1		Session 1	Session 2	Session 3	Session 4	Session 5	Session 6	Session 7	Session 8	Session 9	Session 10
Number	1	60	60	50	50	50	57	40	57	75	50
	2	40	60	60	50	50	50	56	71	60	57
	3	60	30	40	57.1	50	57	57	50	50	67
	4	60	60	60	50	37.5	67	50	50	57	50
	5	60	20	40	40	60	50	60	43	60	50
	6	50	40	50	60	57.1	60	75	50	57	67
	7	40	50	50	62.5	40	40	40	40	50	60
	Mean	52.8571	45.7143	50	52.8	49.2286	54.4286	54	51.5714	58.4286	57.2857

## Sheet: Sham vs MPH
Figure 1- Supplementary Figure 1 B: comparisons of total % correct choices in DNMTP T-maze
Summary Statistics (arithmetic from Sigma Plot 11)
Sham vs. MPH
Session 1
Normality Test (Shapiro-Wilk) Passed (P = 0.530)
Equal Variance Test: Failed (P < 0.050)
Group		Total n	Mean	SD	SE	C.I. of Mean (95%conf)	Median	0.25	0.75
Sham		7	38.571	13.452	5.084	12.441	40	30	47.5
MPH		7	51.429	18.645	7.047	17.243	60	32.5	60
Session 2
Normality Test (Shapiro-Wilk) Passed (P = 0.366)
Equal Variance Test: Passed (P = 0.374)
Source of Variation	DF	SS	MS	F	P
Between Groups	1	864.286	864.286	15.783	0.002
Residual	12	657.143	54.762
Total	13	1521.43
Group		Total n	Mean	SD	SE	C.I. of Mean (95%conf)	Median	0.25	0.75
Sham		7	38.571	6.901	2.608	6.382	40	32.5	40
MPH		7	54.286	7.868	2.974	7.277	60	50	60
Session 3
Normality Test (Shapiro-Wilk) Passed (P = 0.660)
Equal Variance Test: Passed (P = 0.992)
Source of Variation	DF	SS	MS	F	P
Between Groups	1	718.578	718.578	4.636	0.052
Residual	12	1860.08	155.006
Total	13	2578.66
Group		Total n	Mean	SD	SE	C.I. of Mean (95%conf)	Median	0.25	0.75
Sham		7	44.286	7.868	2.974	7.277	40	40	47.5
MPH		7	58.614	15.751	5.953	14.568	60	44.6	70
Session 4
Normality Test (Shapiro-Wilk) :Passed (P = 0.201)
Equal Variance Test: Passed (P = 0.588)
Source of Variation	DF	SS	MS	F	P
Between Groups	1	1501.79	1501.79	17.894	0.001
Residual	12	1007.14	83.929
Total	13	2508.93
Group		Total n	Mean	SD	SE	C.I. of Mean (95%conf)	Median	0.25	0.75
Sham		7	33.571	10.293	3.891	9.52	30	26.25	40
MPH		7	54.286	7.868	2.974	7.277	60	50	60
Session 5
Normality Test (Shapiro-Wilk) Passed (P = 0.403)
Equal Variance Test: Passed (P = 0.537)
Source of Variation	DF	SS	MS	F	P
Between Groups	1	864.286	864.286	7.118	0.02
Residual	12	1457.14	121.429
Total	13	2321.42
Group		Total n	Mean	SD	SE	C.I. of Mean (95%conf)	Median	0.25	0.75
Sham		7	35.714	11.339	4.286	10.487	30	30	47.5
MPH		7	51.429	10.69	4.041	9.887	50	50	60
Session 6
Normality Test (Shapiro-Wilk) Passed (P = 0.318)
Equal Variance Test: Passed (P = 0.908)
Source of Variation	DF	SS	MS	F	P
Between Groups	1	1440.29	1440.29	18.573	0.001
Residual	12	930.571	77.548
Total	13	2370.86
Group		Total n	Mean	SD	SE	C.I. of Mean (95%conf)	Median	0.25	0.75
Sham		7	32.571	9.897	3.741	9.153	30	26.25	38.25
MPH		7	52.857	7.559	2.857	6.991	50	50	60
Session 7
Normality Test (Shapiro-Wilk) Passed (P = 0.753)
Equal Variance Test: Passed (P = 0.409)
Source of Variation	DF	SS	MS	F	P
Between Groups	1	1628.64	1628.64	22.245	<0.001
Residual	12	878.571	73.214
Total	13	2507.21
Group		Total n	Mean	SD	SE	C.I. of Mean (95%conf)	Median	0.25	0.75
Sham		7	36.571	10.293	3.891	9.52	40	30	43
MPH		7	58.143	6.362	2.405	5.884	60	51.75	62.25
Session 8
Normality Test (Shapiro-Wilk) Failed (P < 0.050)
Group		Total n	Mean	SD	SE	C.I. of Mean (95%conf)	Median	0.25	0.75
Sham		7	40	0	0	0	40	40	40
MPH		7	62.714	8.056	3.045	7.451	63	57.75	67
Session 9
Normality Test (Shapiro-Wilk) Passed (P = 0.078)
Equal Variance Test: Passed (P = 0.947)
Source of Variation	DF	SS	MS	F	P
Between Groups	1	880.071	880.071	10.702	0.007
Residual	12	986.857	82.238
Total	13	1866.93
Group		Total n	Mean	SD	SE	C.I. of Mean (95%conf)	Median	0.25	0.75
Sham		7	40	10	3.78	9.248	40	40	47.5
MPH		7	55.857	8.03	3.035	7.426	50	50	64.5
Session 10
Normality Test (Shapiro-Wilk) Passed (P = 0.059)
Equal Variance Test: Passed (P = 1.000)
Source of Variation	DF	SS	MS	F	P
Between Groups	1	1207.14	1207.14	21.125	<0.001
Residual	12	685.714	57.143
Total	13	1892.86
Group		Total n	Mean	SD	SE	C.I. of Mean (95%conf)	Median	0.25	0.75
Sham		7	40	8.165	3.086	7.551	40	32.5	47.5
MPH		7	58.571	6.901	2.608	6.382	60	52.5	60
Source Data
Sham		Session 1	Session 2	Session 3	Session 4	Session 5	Session 6	Session 7	Session 8	Session 9	Session 10
Number	1	20	40	40	40	40	50	50	40	50	40
	2	40	40	40	40	50	33	43	40	40	50
	3	60	40	40	30	30	25	40	40	50	40
	4	40	40	60	50	20	40	43	40	40	50
	5	30	30	40	20	50	30	20	40	20	30
	6	50	30	50	25	30	30	30	40	40	40
	7	30	50	40	30	30	20	30	40	40	30
	Mean	38.5714	38.5714	44.2857	33.5714	35.7143	32.5714	36.5714	40	40	40
MPH		Session 1	Session 2	Session 3	Session 4	Session 5	Session 6	Session 7	Session 8	Session 9	Session 10
Number	1	60	50	50	60	50	50	60	67	50	70
	2	30	60	60	60	60	50	63	50	50	60
	3	60	50	42.8	60	60	50	57	57	67	50
	4	60	60	80	40	30	60	67	75	57	60
	5	80	40	70	50	50	60	60	67	50	60
	6	40	60	70	60	50	60	50	63	67	60
	7	30	60	37.5	50	60	40	50	60	50	50
	Mean	51.4286	54.2857	58.6143	54.2857	51.4286	52.8571	58.1429	62.7143	55.8571	58.5714

## Sheet: tDCS-PFC vs tDCS-M1
Figure 1- Supplementary Figure 1 B: comparisons of total % correct choices in DNMTP T-maze
Summary Statistics (arithmetic from Sigma Plot 11)
tDCS-PFC vs. tDCS-M1
Session 1
Normality Test (Shapiro-Wilk) Passed (P = 0.078)
Equal Variance Test: Passed (P = 0.537)
Source of Variation	DF	SS	MS	F	P
Between Groups	1	257.143	257.143	2.038	0.179
Residual	12	1514.29	126.19
Total	13	1771.43
Group		Total n	Mean	SD	SE	C.I. of Mean (95%conf)	Median	0.25	0.75
tDCS-PFC		7	44.286	12.724	4.809	11.768	40	32.5	57.5
tDCS-M1		7	52.857	9.512	3.595	8.797	60	42.5	60
Session 2
Normality Test (Shapiro-Wilk) Failed (P < 0.050)
Group		Total n	Mean	SD	SE	C.I. of Mean (95%conf)	Median	0.25	0.75
tDCS-PFC		7	57.143	7.559	2.857	6.991	60	60	60
tDCS-M1		7	45.714	16.183	6.117	14.967	50	32.5	60
Session 3
Normality Test (Shapiro-Wilk) Passed (P = 0.540)
Equal Variance Test: Passed (P = 0.843)
Source of Variation	DF	SS	MS	F	P
Between Groups	1	158.458	158.458	2.037	0.179
Residual	12	933.494	77.791
Total	13	1091.95
Group		Total n	Mean	SD	SE	C.I. of Mean (95%conf)	Median	0.25	0.75
tDCS-PFC		7	56.729	9.43	3.564	8.721	60	51.775	60
tDCS-M1		7	50	8.165	3.086	7.551	50	42.5	57.5
Session 4
Normality Test (Shapiro-Wilk) : Passed (P = 0.442)
Equal Variance Test: Passed (P = 0.610)
Source of Variation	DF	SS	MS	F	P
Between Groups	1	52.071	52.071	1.013	0.334
Residual	12	617.117	51.426
Total	13	669.189
Group		Total n	Mean	SD	SE	C.I. of Mean (95%conf)	Median	0.25	0.75
tDCS-PFC		7	56.657	6.65	2.513	6.15	60	50	60
tDCS-M1		7	52.8	7.657	2.894	7.082	50	50	59.275
Session 5
Normality Test (Shapiro-Wilk) Passed (P = 0.144)
Equal Variance Test: Passed (P = 0.942)
Source of Variation	DF	SS	MS	F	P
Between Groups	1	520.94	520.94	9.083	0.011
Residual	12	688.209	57.351
Total	13	1209.15
Group		Total n	Mean	SD	SE	C.I. of Mean (95%conf)	Median	0.25	0.75
tDCS-PFC		7	61.429	6.901	2.608	6.382	60	60	67.5
tDCS-M1		7	49.229	8.19	3.096	7.575	50	42.5	55.325
Session 6
Normality Test (Shapiro-Wilk) Passed (P = 0.904)
Equal Variance Test: Passed (P = 0.742)
Source of Variation	DF	SS	MS	F	P
Between Groups	1	178.571	178.571	2.68	0.128
Residual	12	799.429	66.619
Total	13	978
Group		Total n	Mean	SD	SE	C.I. of Mean (95%conf)	Median	0.25	0.75
tDCS-PFC		7	61.571	7.635	2.886	7.061	60	57	69
tDCS-M1		7	54.429	8.658	3.272	8.007	57	50	59.25
Session 7
Normality Test (Shapiro-Wilk) Passed (P = 0.164)
Equal Variance Test: Passed (P = 0.211)
Source of Variation	DF	SS	MS	F	P
Between Groups	1	185.786	185.786	2.258	0.159
Residual	12	987.429	82.286
Total	13	1173.21
Group		Total n	Mean	SD	SE	C.I. of Mean (95%conf)	Median	0.25	0.75
tDCS-PFC		7	61.286	3.861	1.459	3.571	63	57.75	63
tDCS-M1		7	54	12.234	4.624	11.314	56	42.5	59.25
Session 8
Normality Test (Shapiro-Wilk) Passed (P = 0.180)
Equal Variance Test: Passed (P = 0.051)
Source of Variation	DF	SS	MS	F	P
Between Groups	1	578.571	578.571	9.094	0.011
Residual	12	763.429	63.619
Total	13	1342
Group		Total n	Mean	SD	SE	C.I. of Mean (95%conf)	Median	0.25	0.75
tDCS-PFC		7	64.429	4.86	1.837	4.495	63	60	69.25
tDCS-M1		7	51.571	10.179	3.847	9.414	50	44.75	55.25
Session 9
Normality Test (Shapiro-Wilk) Passed (P = 0.172)
Equal Variance Test: Passed (P = 0.382)
Source of Variation	DF	SS	MS	F	P
Between Groups	1	171.5	171.5	3.492	0.086
Residual	12	589.429	49.119
Total	13	760.929
Group		Total n	Mean	SD	SE	C.I. of Mean (95%conf)	Median	0.25	0.75
tDCS-PFC		7	65.429	5.224	1.974	4.831	67	60	70
tDCS-M1		7	58.429	8.423	3.184	7.79	57	51.75	60
Session 10
Normality Test (Shapiro-Wilk) Failed (P < 0.050)
Group		Total n	Mean	SD	SE	C.I. of Mean (95%conf)	Median	0.25	0.75
tDCS-PFC		7	66.571	6.373	2.409	5.894	70	60	70.75
tDCS-M1		7	57.286	7.697	2.909	7.118	57	50	65.25
Source Data
tDCS-PFC		Session 1	Session 2	Session 3	Session 4	Session 5	Session 6	Session 7	Session 8	Session 9	Session 10
Number	1	40	60	40	50	60	63	63	71	71	60
	2	40	60	60	60	60	71	56	60	67	75
	3	30	40	60	50	70	56	57	70	60	70
	4	30	60	50	60	70	71	63	67	60	71
	5	50	60	70	50	60	60	67	63	60	60
	6	60	60	57.1	66.6	60	60	63	60	70	70
	7	60	60	60	60	50	50	60	60	70	60
	Mean	44.2857	57.1429	56.7286	56.6571	61.4286	61.5714	61.2857	64.4286	65.4286	66.5714
tDCS-M1		Session 1	Session 2	Session 3	Session 4	Session 5	Session 6	Session 7	Session 8	Session 9	Session 10
Number	1	60	60	50	50	50	57	40	57	75	50
	2	40	60	60	50	50	50	56	71	60	57
	3	60	30	40	57.1	50	57	57	50	50	67
	4	60	60	60	50	37.5	67	50	50	57	50
	5	60	20	40	40	60	50	60	43	60	50
	6	50	40	50	60	57.1	60	75	50	57	67
	7	40	50	50	62.5	40	40	40	40	50	60
	Mean	52.8571	45.7143	50	52.8	49.2286	54.4286	54	51.5714	58.4286	57.2857
