# Supplementary material for: Therapeutic effects of anodal transcranial direct current stimulation in a rat model of ADHD
Source: eLife journal article supplement (doi:10.7554/elife.56359), 2020-09-21
Supplement: supp [file Figure 1-figure supplement 2.xlsx]

## Sheet: Fig1-Suppl2A
Figure 1-Supplementary Figure2 A : Total distance in the open field test
Summary Statistics (arithmetic from Sigma Plot 11)
Normality Test (Shapiro-Wilk): Passed (P = 0.093)
Equal Variance Test: Passed (P = 0.950)
Source of Variation	DF	SS	MS	F	P
Between Groups	2	146154	73077.1	0.064	0.938
Residual	12	1.36996e+07	1.14163e+06
Total	14	1.38458e+07
Group		Total n	Mean	SD	SE	C.I. of Mean (95%conf)	Median	0.25	0.75
WKY		5	6614.12	950.782	425.203	1180.55	6470.25	5758.57	7523.57
WKY-Sham		5	6697.51	1163	520.109	1444.05	6263.75	5930.11	7258.04
WKY-tDCS-PFC		5	6459.27	1080.9	483.394	1342.12	6169.8	5582.32	7573.38
Source Data
WKY	Number	Total distance (cm)			WKY-Sham	Number	Total distance (cm)			WKY-tDCS-PFC	Number	Total distance (cm)
	1	5612.66				1	8666.08				1	7557.63
	2	6470.25				2	5975.7				2	6169.8
	3	7723.6				3	6788.69				3	7620.61
	4	5807.21				4	6263.75				4	5257.82
	5	7456.9				5	5793.34				5	5690.49

## Sheet: Fig1-Suppl2B
Figure 1-Supplementary Figure2 B : Mean speed in the open field test
Summary Statistics (arithmetic from Sigma Plot 11)
Normality Test (Shapiro-Wilk): Passed (P = 0.086)
Equal Variance Test: Passed (P = 0.975)
Source of Variation	DF	SS	MS	F	P
Between Groups	2	0.436	0.218	0.161	0.853
Residual	12	16.186	1.349
Total	14	16.622
Group		Total n	Mean	SD	SE	C.I. of Mean (95%conf)	Median	0.25	0.75
WKY		5	7.682	1.142	0.511	1.418	7.19	6.96	8.555
WKY-Sham		5	7.704	1.178	0.527	1.463	7.66	6.822	8.313
WKY-tDCS		5	7.332	1.164	0.52	1.445	6.82	6.365	8.49
Source Data
WKY	Number	Mean speed (cm/s)			WKY-Sham	Number	Mean speed (cm/s)			WKY-tDCS	Number	Mean speed (cm/s)
	1	9.35				1	9.55				1	8.4
	2	6.45				2	7.66				2	8.76
	3	8.29				3	7.9				3	6.82
	4	7.13				4	6.94				4	6.39
	5	7.19				5	6.47				5	6.29

## Sheet: Fig1-Suppl2C
Figure 1-Supplementary Figure2 C : % of correct choice (total sessions)
Summary Statistics (arithmetic from Sigma Plot 11)
Normality Test (Shapiro-Wilk): Passed (P = 0.103)
Equal Variance Test: Passed (P = 0.481)
Source of Variation	DF	SS	MS	F	P
Between Groups	2	24.231	12.116	3.125	0.06
Residual	27	104.679	3.877
Total	29	128.911
Group		Total sessions	Mean	SD	SE	C.I. of Mean (95%conf)	Median	0.25	0.75
WKY		10	73.199	2.277	0.72	1.629	73.5	71.389	75.167
WKY-Sham		10	72.357	1.492	0.472	1.067	72.31	71.429	73.444
WKY-tDCS		10	74.54	2.055	0.65	1.47	75.159	74.286	75.714
Source Data
WKY	Sessions	% of correct choice			WKY-Sham	Sessions	% of correct choice			WKY-tDCS	Sessions	% of correct choice
	1	75.1667				1	71.4444				1	74.4841
	2	72.7857				2	70				2	70.9524
	3	70.119				3	71.4286				3	70.9524
	4	76.2222				4	74.8889				4	75
	5	74.1667				5	73.3333				5	74.2857
	6	75.3333				6	72				6	75.4762
	7	69.5238				7	70.7937				7	77.1429
	8	72.8333				8	72.619				8	75.7143
	9	71.3889				9	73.4444				9	75.3175
	10	74.4524				10	73.619				10	76.0714

## Sheet: Fig1-Suppl2D
Figure 1-Supplementary Figure2 D : % of correct choice
WKY-Sham vs. WKY-tDCS
Session 1
Normality Test (Shapiro-Wilk): Passed (P = 0.649)
Equal Variance Test: Passed (P = 0.366)
Source of Variation	DF	SS	MS	F	P
Between Groups	1	23.099	23.099	0.236	0.64
Residual	8	783.767	97.971
Total	9	806.866
Group		Total n	Mean	SD	SE	C.I. of Mean (95%conf)	Median	0.25	0.75
WKY-Sham		5	71.444	11.108	4.968	13.793	66.667	65	78.472
WKY-tDCS		5	74.484	8.517	3.809	10.576	75	69.196	79.762
Session 2
Normality Test (Shapiro-Wilk); Passed (P = 0.163)
Equal Variance Test:	Passed	(P = 0.462)
Source of Variation	DF	SS	MS	F	P
Between Groups	1	2.268	2.268	0.0407	0.845
Residual	8	446.117	55.765
Total	9	448.384
Group		Total n	Mean	SD	SE	C.I. of Mean (95%conf)	Median	0.25	0.75
WKY-Sham		5	70.952	7.222	3.23	8.967	66.667	66.667	74.405
WKY-tDCS		5	70	7.706	3.446	9.568	70	62.5	76.25
Session 3
Normality Test (Shapiro-Wilk) Passed (P = 0.402)
Equal Variance Test: Failed (P < 0.050)
Group		Total n	Mean	SD	SE	C.I. of Mean (95%conf)	Median	0.25	0.75
WKY-Sham		5	71.429	11.542	5.162	14.331	66.667	64.286	83.333
WKY-tDCS		5	70.952	4.175	1.867	5.184	71.429	66.667	75
Session 4
Normality Test (Shapiro-Wilk) : Passed (P = 0.449)
Equal Variance Test: Passed (P = 0.774)
Source of Variation	DF	SS	MS	F	P
Between Groups	1	0.0309	0.0309	0.000627	0.981
Residual	8	394.049	49.256
Total	9	394.08
Group		Total n	Mean	SD	SE	C.I. of Mean (95%conf)	Median	0.25	0.75
WKY-Sham		5	75	6.186	2.766	7.681	71.429	71.429	77.679
WKY-tDCS		5	74.889	7.762	3.471	9.638	77.778	66.667	80.833
Session 5
Normality Test (Shapiro-Wilk) Passed (P = 0.425)
Equal Variance Test: Failed (P < 0.050)
Group		Total n	Mean	SD	SE	C.I. of Mean (95%conf)	Median	0.25	0.75
WKY-Sham		5	73.333	6.972	3.118	8.657	75	66.667	77.083
WKY-tDCS		5	74.286	11.952	5.345	14.841	71.429	67.857	85.714
Session 6
Normality Test (Shapiro-Wilk) Passed (P = 0.192)
Equal Variance Test: Passed (P = 0.450)
Source of Variation	DF	SS	MS	F	P
Between Groups	1	30.21	30.21	0.377	0.556
Residual	8	640.884	80.111
Total	9	671.094
Group		Total n	Mean	SD	SE	C.I. of Mean (95%conf)	Median	0.25	0.75
WKY-Sham		5	75.476	6.766	3.026	8.401	75	72.917	77.679
WKY-tDCS		5	72	10.698	4.784	13.283	66.667	65	83.333
Session 7
Normality Test (Shapiro-Wilk) Passed (P = 0.534)
Equal Variance Test: Failed (P < 0.050)
Group		Total n	Mean	SD	SE	C.I. of Mean (95%conf)	Median	0.25	0.75
WKY-Sham		5	70.794	4.573	2.045	5.678	71.429	66.667	73.016
WKY-tDCS		5	77.143	10.384	4.644	12.894	77.778	66.667	86.508
Session 8
Normality Test (Shapiro-Wilk) Failed (P < 0.050)
Group		Total n	Mean	SD	SE	C.I. of Mean (95%conf)	Median	0.25	0.75
WKY-Sham		5	75.714	5.868	2.624	7.287	75	71.429	77.679
WKY-tDCS		5	72.619	6.942	3.104	8.619	71.429	66.667	77.083
Session 9
Normality Test (Shapiro-Wilk) Passed (P = 0.229)
Equal Variance Test: Passed (P = 0.770)
Source of Variation	DF	SS	MS	F	P
Between Groups	1	8.77	8.77	0.128	0.73
Residual	8	548.899	68.612
Total	9	557.669
Group		Total n	Mean	SD	SE	C.I. of Mean (95%conf)	Median	0.25	0.75
WKY-Sham		5	73.444	9.283	4.151	11.526	70	66.667	78.472
WKY-tDCS		5	75.317	7.145	3.195	8.872	75	70.238	79.762
Session 10
Normality Test (Shapiro-Wilk) Passed (P = 0.601)
Equal Variance Test: Passed (P = 0.948)
Source of Variation	DF	SS	MS	F	P
Between Groups	1	15.035	15.035	0.15	0.709
Residual	8	803.022	100.378
Total	9	818.057
Group		Total n	Mean	SD	SE	C.I. of Mean (95%conf)	Median	0.25	0.75
WKY-Sham		5	76.071	9.91	4.432	12.305	75	69.196	85.714
WKY-tDCS		5	73.619	10.126	4.529	12.573	71.429	65.625	81.875
Source Data
WKY-Sham		Session 1	Session 2	Session 3	Session 4	Session 5	Session 6	Session 7	Session 8	Session 9	Session 10
Number	1	66.6667	70	66.6667	80	75	66.6667	71.4286	75	70	87.5
	2	66.6667	62.5	83.3333	66.6667	75	83.3333	71.4286	66.6667	75	80
	3	88.8889	75	57.1429	66.6667	66.6667	60	66.6667	71.4286	66.6667	62.5
	4	60	80	66.6667	83.3333	66.6667	83.3333	66.6667	83.3333	66.6667	71.4286
	5	75	62.5	83.3333	77.7778	83.3333	66.6667	77.7778	66.6667	88.8889	66.6667
	Mean	71.4444	70	71.4286	74.8889	73.3333	72	70.7937	72.619	73.4444	73.619
WKY-tDCS		Session 1	Session 2	Session 3	Session 4	Session 5	Session 6	Session 7	Session 8	Session 9	Session 10
Number	1	62.5	71.4286	71.4286	75	85.7143	85.7143	77.7778	75	75	85.7143
	2	75	66.6667	66.6667	71.4286	71.4286	75	88.8889	75	66.6667	62.5
	3	71.4286	66.6667	75	85.7143	85.7143	75	85.7143	71.4286	71.4286	75
	4	85.7143	83.3333	66.6667	71.4286	57.1429	66.6667	66.6667	85.7143	85.7143	71.4286
	5	77.7778	66.6667	75	71.4286	71.4286	75	66.6667	71.4286	77.7778	85.7143
	Mean	74.4841	70.9524	70.9524	75	74.2857	75.4762	77.1429	75.7143	75.3175	76.0714
