# Supplementary material for: Therapeutic effects of anodal transcranial direct current stimulation in a rat model of ADHD
Source: eLife journal article supplement (doi:10.7554/elife.56359), 2020-09-21
Supplement: supp [file Figure 1.xlsx]

## Sheet: Figure 1A
Figure 1 -source data 1
Figure 1A: Mean speed in the Open field test
Summary Statistics (arithmetic from Sigma Plot 11)
Normality Test (Shapiro-Wilk): passed (P = 0.513)
Equal Variance Test: Passed (P = 0.084)
Source of Variation	DF	SS	MS	F	P
Between Groups	5	30.627	6.125	5.984	<0.001
Residual	42	42.993	1.024
Total	47	73.621
Group		Total n	Mean	SD	SE	C.I. of Mean (95%conf)	Median	0.25	0.75
WKY		8	7.338	1.455	0.514	1.216	7.545	6.275	8.56
SHR		8	9.527	0.752	0.266	0.629	9.47	8.89	10.105
Sham		8	9.251	0.666	0.235	0.557	9.155	8.775	9.735
tDCS-PFC		8	7.729	1.241	0.439	1.037	7.58	6.66	8.515
tDCS-M1		8	7.975	0.919	0.325	0.769	7.865	7.14	8.825
MPH		8	8.056	0.795	0.281	0.665	7.645	7.515	8.49
Source Data
WKY	Number	Mean speed (cm/s)			SHR	Number	Mean speed (cm/s)			Sham	Number	Mean speed (cm/s)
	1	5.91				1	9.05				1	8.35
	2	4.92				2	9.61				2	8.75
	3	7.92				3	8.59				3	8.8
	4	6.64				4	10.36				4	9.73
	5	7.17				5	10.7				5	10.33
	6	8.92				6	9.85				6	9.74
	7	9.02				7	9.33				7	8.85
	8	8.2				8	8.73				8	9.46
tDCS-PFC	Number	Mean speed (cm/s)			tDCS-M1	Number	Mean speed (cm/s)			MPH	Number	Mean speed (cm/s)
	1	8.46				1	8.5				1	7.54
	2	6.5				2	7.28				2	8.5
	3	6.6				3	6.9				3	7.44
	4	6.72				4	8.02				4	7.59
	5	6.77				5	7.71				5	9.71
	6	8.39				6	7				6	7.7
	7	9.82				7	9.24				7	7.49
	8	8.57				8	9.15				8	8.48

## Sheet: Figure 1B
Figure 1 -source data 1
Figure 1B: % of correct choice (total sessions) in DNMTP T-maze
Summary Statistics (arithmetic from Sigma Plot 11)
Normality Test (Shapiro-Wilk) Failed (P < 0.050)
Equal Variance Test: Passed (P = 0.371)
Source of Variation	DF	SS	MS	F	P
Between Groups	5	9543.06	1908.61	116.861	<0.001
Residual	54	881.946	16.332
Total	59	10425
Group		Total sessions	Mean	SD	SE	C.I. of Mean (95%conf)	Median	0.25	0.75
WKY		10	73.05	3.537	1.119	2.53	73.5	70.657	76
SHR		10	36.357	2.085	0.659	1.492	36.3	35.714	37.571
Sham		10	37.986	3.472	1.098	2.484	38.571	35.714	40
tDCS-PFC		10	59.553	6.441	2.037	4.608	61.357	56.729	64.429
tDCS-M1		10	52.631	3.77	1.192	2.697	52.829	50	54.429
MPH		10	55.819	3.657	1.156	2.616	55.071	52.857	58.571
Source Data
WKY	Sessions	% of correct choice			SHR	Sessions	% of correct choice			Sham	Sessions	% of correct choice
	1	71.4286				1	35.7143				1	38.5714
	2	72.8571				2	35.7143				2	38.5714
	3	68.0857				3	37.8857				3	44.2857
	4	67.8571				4	36.0286				4	33.5714
	5	70.6571				5	37.5714				5	35.7143
	6	76.0429				6	32.0857				6	32.5714
	7	74.8571				7	37.4286				7	36.5714
	8	78.5714				8	39.8571				8	40
	9	74.1429				9	34.7143				9	40
	10	76				10	36.5714				10	40
tDCS-PFC	Sessions	% of correct choice			tDCS-M1	Sessions	% of correct choice			MPH	Sessions	% of correct choice
	1	44.2857				1	52.8571				1	51.4286
	2	57.1429				2	45.7143				2	54.2857
	3	56.7286				3	50				3	58.6143
	4	56.6571				4	52.8				4	54.2857
	5	61.4286				5	49.2286				5	51.4286
	6	61.5714				6	54.4286				6	52.8571
	7	61.2857				7	54				7	58.1429
	8	64.4286				8	51.5714				8	62.7143
	9	65.4286				9	58.4286				9	55.8571
	10	66.5714				10	57.2857				10	58.5714

## Sheet: Figure 1C
Figure 1 -source data 1
Figure 1C: % of time in new arms in modified Y-maze
Summary Statistics (arithmetic from Sigma Plot 11)
Normality Test (Shapiro-Wilk): Failed (P < 0.050)
Group		Total n	Mean	SD	SE	C.I. of Mean (95%conf)	Median	0.25	0.75
WKY		8	11.504	4.73	1.672	3.954	9.33	8.265	16.7
SHR		8	30.339	4.088	1.445	3.418	28.575	27.38	34.83
Sham		8	29.545	5.235	1.851	4.376	28.115	25.645	32.46
tDCS-PFC		8	21.159	4.706	1.664	3.934	21.15	19.4	24
tDCS-M1		8	19.811	4.967	1.756	4.153	19.715	15.92	21.845
MPH		8	23.315	5.218	1.845	4.362	21.275	19.89	28.56
Source Data
WKY	Number	Time in new arms (%)			SHR	Number	Time in new arms (%)			Sham	Number	Time in new arms (%)
	1	8.98				1	35.15				1	36.58
	2	9.65				2	28.29				2	38.83
	3	7.55				3	28.84				3	28.34
	4	9.01				4	35.61				4	25.27
	5	16.81				5	34.51				5	28.04
	6	16.59				6	28.31				6	28.19
	7	17.67				7	25.53				7	26.02
	8	5.77				8	26.47				8	25.09
tDCS-PFC	Number	Time in new arms (%)			tDCS-M1	Number	Time in new arms (%)			MPH	Number	Time in new arms (%)
	1	28.01				1	21.82				1	27.09
	2	20.27				2	29.64				2	20.72
	3	22.03				3	18.83				3	30.03
	4	12.16				4	13.89				4	16.51
	5	22.75				5	21.87				5	19.76
	6	25.25				6	15.25				6	30.56
	7	19.63				7	16.59				7	21.83
	8	19.17				8	20.6				8	20.02

## Sheet: Figure 1D
Figure 1 -source data 1
Figure 1D: % alternation performance in the Y-maze spontaneous alternation task
Summary Statistics (arithmetic from Sigma Plot 11)
SAP (spontaneous alternation performance)
Normality Test (Shapiro-Wilk): Failed (P < 0.050)
Group		Total n	Mean	SD	SE	C.I. of Mean (95%conf)	Median	0.25	0.75
WKY		7	56.561	5.245	1.982	4.851	57	52.381	57.143
SHR		7	29.563	4.626	1.749	4.278	29.4	25	33.3
Sham		7	37.735	7.746	2.928	7.164	36	33.3	38.6
tDCS-PFC		7	48.729	2.257	0.853	2.087	48.1	47	50
tDCS-M1		7	42.653	3.054	1.154	2.824	42.8	40	44.444
MPH		7	49.375	4.317	1.632	3.992	50	45.4	52
Source Data
WKY	Number	% of performance			SHR	Number	% of performance			Sham	Number	% of performance
	1	57				1	29.4				1	38
	2	50				2	33.3				2	33.3
	3	66.7				3	33.3				3	36
	4	57.1				4	29.1				4	38.6
	5	55.6				5	25				5	29.4
	6	52.381				6	34.6154				6	35
	7	57.1429				7	22.2222				7	53.8462
tDCS-PFC	Number	% of performance			tDCS-M1	Number	% of performance			MPH	Number	% of performance
	1	48.1				1	38.5				1	55.5
	2	52.6				2	41.6				2	52
	3	47				3	42.8				3	50
	4	46.1				4	43.4				4	45.4
	5	50				5	40				5	42.9
	6	47.3				6	47.8261				6	47.8261
	7	50				7	44.4444				7	52
AAR (alternate arm return)
Normality Test (Shapiro-Wilk): Passed (P = 0.501)
Equal Variance Test: Passed (P = 0.873)
Source of Variation	DF	SS	MS	F	P
Between Groups	5	429.33	85.866	0.75	0.591
Residual	36	4119.55	114.432
Total	41	4548.88
Group		Total n	Mean	SD	SE	C.I. of Mean (95%conf)	Median	0.25	0.75
WKY		7	20.165	11.675	4.413	10.797	22.2	8.098	29.625
SHR		7	28.222	10.154	3.838	9.391	29.4	20.905	37.5
Sham		7	29.648	14.081	5.322	13.022	28.6	19.325	34.725
tDCS-PFC		7	23.39	8.916	3.37	8.246	25.1	14.575	30.375
tDCS-M1		7	23.4	10.071	3.806	9.314	20.8	15.598	31
MPH		7	23.975	8.247	3.117	7.627	22.2	16.963	31.125
Source Data
WKY	Number	% of performance			SHR	Number	% of performance			Sham	Number	% of performance
	1	22.2				1	29.4				1	33.3
	2	28.5				2	38.9				2	16.7
	3	33.3				3	33.3				3	27.2
	4	30				4	39.1				4	35.2
	5	17.3913				5	11.7				5	28.6
	6	5				6	19.2308				6	55
	7	4.7619				7	25.9259				7	11.5385
tDCS-PFC	Number	% of performance			tDCS-M1	Number	% of performance			MPH	Number	% of performance
	1	25.1				1	11.1111				1	22.2
	2	29.4				2	15				2	32
	3	30.7				3	31.8				3	35
	4	35				4	20.8				4	28.5
	5	17.3913				5	28.6				5	21.7
	6	13.6364				6	39.1				6	15.3846
	7	12.5				7	17.3913				7	13.0435
SAR (same arm return)
Normality Test (Shapiro-Wilk): Failed (P < 0.050)
Group		Total n	Mean	SD	SE	C.I. of Mean (95%conf)	Median	0.25	0.75
WKY		7	10.03	7.187	2.717	6.647	10	7.1	11.1
SHR		7	26.699	9.363	3.539	8.659	22.2	18.519	34.615
Sham		7	27.061	8.868	3.352	8.202	27.8	18.1	30.769
tDCS-PFC		7	9.183	5.831	2.204	5.393	5.2	5	15.3
tDCS-M1		7	19.203	8.163	3.085	7.549	16.7	14.3	26.087
MPH		7	9.02	3.165	1.196	2.927	9.5	5	11.538
Source Data
WKY	Number	% of performance			SHR	Number	% of performance			Sham	Number	% of performance
	1	0				1	17.6				1	27.8
	2	7.1				2	22.2				2	18.1
	3	11.1				3	21.7				3	17.6
	4	7.1				4	29.4				4	28.6
	5	11.1				5	34.6154				5	43.4783
	6	10				6	42.8571				6	30.7692
	7	23.8095				7	18.5185				7	23.0769
tDCS-PFC	Number	% of performance			tDCS-M1	Number	% of performance			MPH	Number	% of performance
	1	3.7				1	20				1	11.1
	2	5.2				2	9				2	8
	3	11.7				3	16.7				3	5
	4	15.3				4	14.3				4	9.5
	5	5				5	15				5	13
	6	5.2				6	26.087				6	5
	7	18.1818				7	33.3333				7	11.5385

## Sheet: Figure 1E
Figure 1 -source data 1
Figure 1E: latency in the passive avoidance test
Summary Statistics (arithmetic from Sigma Plot 11)
Normality Test (Shapiro-Wilk): passed (P = 0.963)
Equal Variance Test: Passed (P = 0.264)
Source of Variation	DF	SS	MS	F	P
Between Groups	5	35110.1	7022.03	31.245	<0.001
Residual	30	6742.3	224.743
Total	35	41852.5
Group		Total n	Mean	SD	SE	C.I. of Mean (95%conf)	Median	0.25	0.75
WKY		6	112.222	15.303	6.248	16.06	120	111.58	120
SHR		6	19.423	8.026	3.276	8.422	16.045	13.34	27.65
Sham		6	25.597	8.604	3.513	9.03	24.88	17.79	31.79
tDCS-PFC		6	63.565	21.541	8.794	22.606	62.78	43.23	77.86
tDCS-M1		6	56.615	15.022	6.133	15.764	52.545	47.85	64.43
MPH		6	76.622	16.916	6.906	17.752	76.255	61.65	91.76
Source Data
WKY	Number	Latancy (s)			SHR	Number	Latancy (s)			Sham	Number	Latancy (s)
	1	111.58				1	17.89				1	21.08
	2	120				2	14.2				2	17.79
	3	120				3	12.32				3	31.79
	4	81.75				4	31.14				4	37.99
	5	120				5	13.34				5	16.25
	6	120				6	27.65				6	28.68
tDCS-PFC	Number	Latancy (s)			tDCS-M1	Number	Latancy (s)			MPH	Number	Latancy (s)
	1	57.9				1	40				1	86.98
	2	67.66				2	64.43				2	65.53
	3	43.23				3	47.85				3	96.23
	4	77.86				4	55.74				4	57.58
	5	38.87				5	82.32				5	61.65
	6	95.87				6	49.35				6	91.76

## Sheet: Figure 1F
Figure 1 -source data 1
Figure 1F: discrimination ratio in the object-place recognition test
Summary Statistics (arithmetic from Sigma Plot 11)
Training
Normality Test (Shapiro-Wilk): Passed (P = 0.163)
Equal Variance Test: Failed (P < 0.050)
Group		Total n	Mean	SD	SE	C.I. of Mean (95%conf)	Median	0.25	0.75
WKY		8	0.00575	0.173	0.0654	0.16	0.0794	-0.154	0.118
SHR		8	0.00937	0.188	0.0711	0.174	-0.0118	-0.164	0.179
Sham		8	0.0251	0.042	0.0159	0.0388	0.0118	0.00722	0.0376
tDCS-PFC		8	0.0121	0.0526	0.0199	0.0486	0.0147	-0.00727	0.0581
tDCS-M1		8	0.0175	0.047	0.0178	0.0435	0.026	-0.0141	0.0588
MPH		8	0.00958	0.0919	0.0347	0.085	0.0436	-0.0434	0.0816
Source Data
WKY	Number	discrimination ratio			SHR	Number	discrimination ratio			Sham	Number	discrimination ratio
	1	-0.0731				1	0.1278				1	0.0094652
	2	0.1234				2	-0.0564				2	0.0118
	3	0.2832				3	-0.0118				3	0.2464
	4	0.2302				4	0.2652				4	-0.0281
	5	-0.2383				5	-0.2341				5	0.0283
	6	-0.1816				6	0.1964				6	0.1072
	7	0.1004				7	-0.2005				7	0.0064683
	8	0.0794				8	0.2442				8	0.0406
tDCS-PFC	Number	discrimination ratio			tDCS-M1	Number	discrimination ratio			MPH	Number	discrimination ratio
	1	0.0697				1	-0.0575				1	-0.0211
	2	0.0682				2	-0.0199				2	-0.156
	3	0.254				3	0.026				3	0.0591
	4	-0.003672				4	0.027				4	-0.0508
	5	0.0147				5	0.0694				5	0.1032
	6	0.0279				6	0.2406				6	0.2132
	7	-0.0837				7	0.074				7	0.0892
	8	-0.0084686				8	0.0035587				8	0.0436
Test
Normality Test (Shapiro-Wilk): passed (P = 0.504)
Equal Variance Test: Passed (P = 0.789)
Source of Variation	DF	SS	MS	F	P
Between Groups	5	0.876	0.175	6.554	<0.001
Residual	42	1.123	0.0267
Total	47	1.999
Group		Total n	Mean	SD	SE	C.I. of Mean (95%conf)	Median	0.25	0.75
WKY		8	0.136	0.126	0.0444	0.105	0.167	0.0101	0.232
SHR		8	-0.227	0.171	0.0603	0.143	-0.273	-0.34	-0.099
Sham		8	-0.154	0.171	0.0605	0.143	-0.148	-0.262	-0.00488
tDCS-PFC		8	0.102	0.199	0.0703	0.166	0.141	-0.0265	0.232
tDCS-M1		8	0.0522	0.103	0.0365	0.0864	0.0205	-0.0358	0.164
MPH		8	0.0543	0.19	0.0672	0.159	0.0844	-0.0716	0.188
Source Data
WKY	Number	discrimination ratio			SHR	Number	discrimination ratio			Sham	Number	discrimination ratio
	1	0.0109				1	-0.2655				1	-0.1873
	2	0.2634				2	-0.2804				2	-0.048
	3	0.0092166				3	-0.2174				3	-0.1085
	4	-0.0332				4	0.0383				4	0.0383
	5	0.1842				5	0.0194				5	0.0437
	6	0.3006				6	-0.43				6	-0.2187
	7	0.1503				7	-0.3675				7	-0.4498
	8	0.2011				8	-0.3121				8	-0.3046
tDCS-PFC	Number	discrimination ratio			tDCS-M1	Number	discrimination ratio			MPH	Number	discrimination ratio
	1	-0.2548				1	0.1818				1	-0.0644
	2	-0.0546				2	0.1828				2	-0.0788
	3	0.0015682				3	0.0042975				3	0.0884
	4	0.1704				4	-0.063				4	0.1346
	5	0.1126				5	0.0367				5	-0.2793
	6	0.1982				6	-0.0192				6	0.3117
	7	0.3737				7	-0.0525				7	0.2419
	8	0.2652				8	0.1472				8	0.0805
