# Supplementary material for: Therapeutic effects of anodal transcranial direct current stimulation in a rat model of ADHD
Source: eLife journal article supplement (doi:10.7554/elife.56359), 2020-09-21
Supplement: supp [file Figure 2-figure supplement 1.xlsx]

## Sheet: Figuer2 -Suppl 1
Figure 2-Supplementary Figure 1 : corticosterone levels by ELISA
Summary Statistics (arithmetic from Sigma Plot 11)
Normality Test (Shapiro-Wilk): Passed (P = 0.238)
Equal Variance Test: Passed (P = 0.690)
Source of Variation	DF	SS	MS	F	P
Between Groups	5	154555	30911	9.262	<0.001
Residual	18	60076.3	3337.57
Total	23	214631
Group		Total n	Mean	SD	SE	C.I. of Mean (95%conf)	Median	0.25	0.75
WKY		5	2.231	1.652	0.739	2.051	2.794	0.712	3.288
WKY-Sham		5	2.263	0.925	0.414	1.148	2.202	1.583	3.119
WKY-tDCS-PFC		5	2.156	1.018	0.455	1.264	1.961	1.624	2.711
SHR		5	3.464	0.67	0.299	0.831	3.504	3.013	3.755
SHR-Sham		5	3.618	0.787	0.352	0.977	3.627	2.91	4.377
SHR-tDCS-PFC		5	3.197	0.542	0.243	0.674	3.121	2.723	3.687
Source Data
WKY	Number	Corticosterone levels (ng/ml)			WKY-Sham	Number	Corticosterone levels (ng/ml)			WKY-tDCS-PFC	Number	Corticosterone levels (ng/ml)
	1	0.2455				1	1.021				1	2.3866
	2	2.951				2	3.0748				2	1.8733
	3	0.8669				3	1.7699				3	1.9607
	4	2.7943				4	3.2497				4	0.8766
	5	4.2977				5	2.2015				5	3.6844
SHR	Number	Corticosterone levels (ng/ml)			SHR-Sham	Number	Corticosterone levels (ng/ml)			SHR-tDCS-PFC	Number	Corticosterone levels (ng/ml)
	1	3.5071				1	2.6878				1	3.1211
	2	3.5045				2	2.9842				2	2.7611
	3	4.4982				3	4.3592				3	3.6271
	4	3.1211				4	4.4315				4	2.6086
	5	2.6878				5	3.6271				5	3.8678
