# Supplementary material for: Therapeutic effects of anodal transcranial direct current stimulation in a rat model of ADHD
Source: eLife journal article supplement (doi:10.7554/elife.56359), 2020-09-21
Supplement: supp [file Figure 2.xlsx]

## Sheet: Figure 2A
Figure 2A : Free TH levels measured by ELISA at 2 days after HD-tDCS
Summary Statistics (arithmetic from Sigma Plot 11)
PFC
Normality Test (Shapiro-Wilk): Passed (P = 0.238)
Equal Variance Test: Passed (P = 0.690)
Source of Variation	DF	SS	MS	F	P
Between Groups	5	154555	30911	9.262	<0.001
Residual	18	60076.3	3337.57
Total	23	214631
Group		Total n	Mean	SD	SE	C.I. of Mean (95%conf)	Median	0.25	0.75
WKY		4	288.815	72.61	36.305	115.538	308.318	245.473	332.156
WKY-Sham		4	262.733	87.143	43.571	138.663	229.22	211.42	314.045
WKY-tDCS-PFC		4	257.857	14.849	7.425	23.628	253.677	248.879	266.834
SHR		4	136.424	28.72	14.36	45.699	143.776	115.914	156.934
SHR-Sham		4	168.078	76.984	38.492	122.498	200.275	122.415	213.741
SHR-tDCS-PFC		4	381.534	13.693	6.846	21.788	378.748	370.853	392.214
Source Data
WKY	Number	TH levels (pg/ml)			WKY-Sham	Number	TH levels (pg/ml)			WKY-tDCS-PFC	Number	TH levels (pg/ml)
	1	310.485				1	236.496				1	279.218
	2	306.151				2	221.945				2	244.854
	3	184.796				3	200.894				3	252.903
	4	353.826				4	391.595				4	254.451
SHR	Number	TH levels (pg/ml)			SHR-Sham	Number	TH levels (pg/ml)			SHR-tDCS-PFC	Number	TH levels (pg/ml)
	1	161.577				1	217.921				1	369.305
	2	135.263				2	209.562				2	372.401
	3	152.29				3	53.8434				3	399.335
	4	96.5655				4	190.987				4	385.094
Striatum
Normality Test (Shapiro-Wilk): Passed (P = 0.772)
Equal Variance Test: Passed (P = 0.661)
Source of Variation	DF	SS	MS	F	P
Between Groups	5	203357	40671.3	3.104	0.034
Residual	18	235821	13101.2
Total	23	439178
Group		Total n	Mean	SD	SE	C.I. of Mean (95%conf)	Median	0.25	0.75
WKY		4	536.169	183.058	91.529	291.285	495.305	405.372	666.967
WKY-Sham		4	558.381	139.331	69.666	221.706	603.967	471.467	645.296
WKY-tDCS-PFC		4	506.14	78.379	39.19	124.719	474.872	457.536	554.744
SHR		4	303.365	92.522	46.261	147.222	304.294	246.402	360.328
SHR-Sham		4	369.228	72.419	36.21	115.235	362.959	316.986	421.47
SHR-tDCS-PFC		4	481.451	75.733	37.866	120.507	457.381	428.126	534.776
Source Data
WKY	Number	TH levels (pg/ml)			WKY-Sham	Number	TH levels (pg/ml)			WKY-tDCS-PFC	Number	TH levels (pg/ml)
	1	444.224				1	620.684				1	487.875
	2	366.519				2	587.25				2	453.202
	3	787.548				3	669.908				3	621.613
	4	546.385				4	355.684				4	461.87
SHR	Number	TH levels (pg/ml)			SHR-Sham	Number	TH levels (pg/ml)			SHR-tDCS-PFC	Number	TH levels (pg/ml)
	1	415.742				1	344.849				1	588.488
	2	304.913				2	381.07				2	433.698
	3	189.13				3	289.124				3	422.553
	4	303.675				4	461.87				4	481.064
Hippocampus
Normality Test (Shapiro-Wilk): Passed (P = 0.669)
Equal Variance Test: Passed (P = 0.675)
Source of Variation	DF	SS	MS	F	P
Between Groups	5	85041.3	17008.3	1.578	0.216
Residual	18	193968	10776
Total	23	279009
Group		Total n	Mean	SD	SE	C.I. of Mean (95%conf)	Median	0.25	0.75
WKY		4	330.298	159.166	79.583	253.268	306.151	218.076	442.521
WKY-Sham		4	323.875	91.968	45.984	146.341	314.045	262.346	385.404
WKY-tDCS-PFC		4	366.906	55.467	27.734	88.26	355.065	322.094	411.718
SHR		4	231.155	117.541	58.77	187.033	253.677	143.622	318.689
SHR-Sham		4	206.157	60.523	30.261	96.305	189.439	159.72	252.594
SHR-tDCS-PFC		4	341.83	101.53	50.765	161.557	302.591	275.503	408.158
Source Data
WKY	Number	TH levels (pg/ml)			WKY-Sham	Number	TH levels (pg/ml)			WKY-tDCS-PFC	Number	TH levels (pg/ml)
	1	542.98				1	222.565				1	322.868
	2	270.24				2	302.127				2	387.261
	3	342.062				3	325.964				3	321.32
	4	165.911				4	444.843				4	436.175
SHR	Number	TH levels (pg/ml)			SHR-Sham	Number	TH levels (pg/ml)			SHR-tDCS-PFC	Number	TH levels (pg/ml)
	1	342.991				1	286.957				1	489.732
	2	74.2757				2	158.791				2	326.583
	3	294.387				3	218.23				3	278.599
	4	212.968				4	160.649				4	272.407
SN/VTA
Normality Test (Shapiro-Wilk): Passed (P = 0.285)
Equal Variance Test: Passed (P = 0.485)
Source of Variation	DF	SS	MS	F	P
Between Groups	5	275331	55066.2	2.102	0.112
Residual	18	471513	26195.2
Total	23	746844
Group		Total n	Mean	SD	SE	C.I. of Mean (95%conf)	Median	0.25	0.75
WKY		4	994.618	121.664	60.832	193.594	971.748	902.325	1086.91
WKY-Sham		4	897.333	233.901	116.95	372.187	815.023	745.6	1049.07
WKY-tDCS-PFC		4	947.02	123.57	61.785	196.627	907.201	876.32	1017.72
SHR		4	687.67	91.818	45.909	146.102	684.767	608.611	766.729
SHR-Sham		4	755.7	112.142	56.071	178.442	752.798	670.14	841.26
SHR-tDCS-PFC		4	818.042	226.679	113.34	360.696	796.448	631.829	1004.25
Source Data
WKY	Number	TH levels (pg/ml)			WKY-Sham	Number	TH levels (pg/ml)			WKY-tDCS-PFC	Number	TH levels (pg/ml)
	1	1155.17				1	1237.37				1	906.272
	2	924.847				2	721.917				2	908.129
	3	1018.65				3	769.283				3	1127.31
	4	879.803				4	860.764				4	846.368
SHR	Number	TH levels (pg/ml)			SHR-Sham	Number	TH levels (pg/ml)			SHR-tDCS-PFC	Number	TH levels (pg/ml)
	1	613.719				1	627.186				1	595.144
	2	777.641				2	890.019				2	668.514
	3	755.816				3	713.094				3	924.382
	4	603.503				4	792.501				4	1084.13

## Sheet: Figure 2B
Figure 2B : Free mBDNF levels measured by ELISA at 2 days after HD-tDCS
Summary Statistics (arithmetic from Sigma Plot 11)
PFC
Normality Test (Shapiro-Wilk): Passed (P = 0.978)
Equal Variance Test: Passed (P = 0.114)
Source of Variation	DF	SS	MS	F	P
Between Groups	5	1.75483e+06	350966	15.327	<0.001
Residual	18	412184	22899.1
Total	23	2.16701e+06
Group		Total n	Mean	SD	SE	C.I. of Mean (95%conf)	Median	0.25	0.75
WKY		4	817.6	86.914	43.457	138.3	813.325	748.26	886.939
WKY-Sham		4	812.613	194.637	97.319	309.71	812.613	644.488	980.738
WKY-tDCS-PFC		4	900.95	130.784	65.392	208.105	948.443	810.001	991.899
SHR		4	469.951	107.388	53.694	170.878	450.716	390.4	549.502
SHR-Sham		4	573.367	53.031	26.516	84.384	593.908	539.766	606.968
SHR-tDCS-PFC		4	1318.85	245.984	122.992	391.413	1291.82	1144.35	1493.35
Source Data
WKY	Number	Free BDNF levels (pg/ml)			WKY-Sham	Number	Free BDNF levels (pg/ml)			WKY-tDCS-PFC	Number	Free BDNF levels (pg/ml)
	1	920.184				1	992.849				1	905.462
	2	723.563				2	968.627				2	714.54
	3	853.694				3	632.377				3	992.374
	4	772.956				4	656.598				4	991.424
SHR	Number	Free BDNF levels (pg/ml)			SHR-Sham	Number	Free BDNF levels (pg/ml)			SHR-tDCS-PFC	Number	Free BDNF levels (pg/ml)
	1	415.334				1	610.055				1	1639.55
	2	365.466				2	583.934				2	1347.15
	3	486.098				3	495.597				3	1052.21
	4	612.905				4	603.881				4	1236.49
Striatum
Normality Test (Shapiro-Wilk): Passed (P = 0.407)
Equal Variance Test: Passed (P = 0.474)
Source of Variation	DF	SS	MS	F	P
Between Groups	5	659219	131844	1.637	0.201
Residual	18	1.44958e+06	80532.5
Total	23	2.1088e+06
Group		Total n	Mean	SD	SE	C.I. of Mean (95%conf)	Median	0.25	0.75
WKY		4	1080.24	170.073	85.037	270.623	1018.73	984.775	1175.7
WKY-Sham		4	1044.85	269.408	134.704	428.687	963.641	868.18	1221.53
WKY-tDCS-PFC		4	1120.96	465.428	232.714	740.598	1160.97	774.856	1467.07
SHR		4	658.498	266.694	133.347	424.368	592.483	459.502	857.494
SHR-Sham		4	799.79	222.022	111.011	353.286	828.285	642.825	956.754
SHR-tDCS-PFC		4	886.108	211.296	105.648	336.219	801.214	762.27	1009.95
Source Data
WKY	Number	Free BDNF levels (pg/ml)			WKY-Sham	Number	Free BDNF levels (pg/ml)			WKY-tDCS-PFC	Number	Free BDNF levels (pg/ml)
	1	1017.07				1	1011.37				1	1629.73
	2	952.48				2	1431.68				2	1304.4
	3	1020.39				3	820.449				3	532.167
	4	1331				4	915.91				4	1017.55
SHR	Number	Free BDNF levels (pg/ml)			SHR-Sham	Number	Free BDNF levels (pg/ml)			SHR-tDCS-PFC	Number	Free BDNF levels (pg/ml)
	1	694.593				1	1035.59				1	742.561
	2	428.632				2	778.655				2	781.98
	3	490.373				3	877.916				3	1199.44
	4	1020.39				4	506.995				4	820.449
Hippocampus
Normality Test (Shapiro-Wilk): Passed (P = 0.495)
Equal Variance Test: Passed (P = 0.128)
Source of Variation	DF	SS	MS	F	P
Between Groups	5	2.32933e+06	465866	14.924	<0.001
Residual	18	561876	31215.3
Total	23	2.89121e+06
Group		Total n	Mean	SD	SE	C.I. of Mean (95%conf)	Median	0.25	0.75
WKY		4	1353.08	206.705	103.352	328.912	1340.02	1212.98	1493.19
WKY-Sham		4	1150.53	102.59	51.295	163.243	1123.22	1074.3	1226.75
WKY-tDCS-PFC		4	1287.66	182.046	91.023	289.676	1247.17	1160.97	1414.35
SHR		4	602.1	111.457	55.729	177.353	568.261	527.417	676.783
SHR-Sham		4	568.024	105.123	52.561	167.273	559.238	478.5	657.548
SHR-tDCS-PFC		4	1087.95	278.255	139.128	442.764	1088.07	852.269	1323.64
Source Data
WKY	Number	Free BDNF levels (pg/ml)			WKY-Sham	Number	Free BDNF levels (pg/ml)			WKY-tDCS-PFC	Number	Free BDNF levels (pg/ml)
	1	1310.58				1	1065.04				1	1289.21
	2	1369.47				2	1083.56				2	1116.81
	3	1616.91				3	1290.63				3	1205.14
	4	1115.38				4	1162.87				4	1539.49
SHR	Number	Free BDNF levels (pg/ml)			SHR-Sham	Number	Free BDNF levels (pg/ml)			SHR-tDCS-PFC	Number	Free BDNF levels (pg/ml)
	1	592.008				1	680.345				1	902.612
	2	544.515				2	634.751				2	1373.74
	3	761.558				3	473.275				3	1273.53
	4	510.32				4	483.724				4	801.927
SN/VTA
Normality Test (Shapiro-Wilk): Passed (P = 0.292)
Equal Variance Test: Passed (P = 0.920)
Source of Variation	DF	SS	MS	F	P
Between Groups	5	370126	74025.2	2.104	0.112
Residual	18	633224	35179.1
Total	23	1.00335e+06
Group		Total n	Mean	SD	SE	C.I. of Mean (95%conf)	Median	0.25	0.75
WKY		4	835.528	142.113	71.056	226.132	811.663	729.025	942.031
WKY-Sham		4	800.265	194.336	97.168	309.231	808.101	667.997	932.533
WKY-tDCS-PFC		4	926.24	130.122	65.061	207.052	974.564	844.671	1007.81
SHR		4	659.21	214.59	107.295	341.459	618.366	489.185	829.235
SHR-Sham		4	541.665	273.026	136.513	434.443	427.919	388.025	695.305
SHR-tDCS-PFC		4	757.046	124.854	62.427	198.669	788.154	665.147	848.945
Source Data
WKY	Number	Free BDNF levels (pg/ml)			WKY-Sham	Number	Free BDNF levels (pg/ml)			WKY-tDCS-PFC	Number	Free BDNF levels (pg/ml)
	1	1022.77				1	556.388				1	953.904
	2	861.293				2	779.605				2	995.223
	3	762.033				3	836.597				3	735.437
	4	696.018				4	1028.47				4	1020.39
SHR	Number	Free BDNF levels (pg/ml)			SHR-Sham	Number	Free BDNF levels (pg/ml)			SHR-tDCS-PFC	Number	Free BDNF levels (pg/ml)
	1	511.27				1	442.405				1	743.985
	2	933.008				2	948.205				2	586.309
	3	467.101				3	362.617				3	865.567
	4	725.463				4	413.434				4	832.322

## Sheet: Figure 2C
Figure 2C : Free TH levels measured by ELISA at 8 days after HD-tDCS
Summary Statistics (arithmetic from Sigma Plot 11)
PFC
Normality Test (Shapiro-Wilk): Passed (P = 0.621)
Equal Variance Test: Passed (P = 0.523)
Source of Variation	DF	SS	MS	F	P
Between Groups	2	90510	45255	17.628	<0.001
Residual	9	23105.3	2567.25
Total	11	113615
Group		Total n	Mean	SD	SE	C.I. of Mean (95%conf)	Median	0.25	0.75
Sham		4	219.082	38.602	19.301	61.423	234.174	196.715	241.449
tDCS-PFC		4	430.061	52.105	26.053	82.911	431.221	386.178	473.943
MPH		4	348.177	59.133	29.566	94.093	341.443	305.996	390.357
Source Data
Sham	Number	TH levels (pg/ml)			tDCS-PFC	Number	TH levels (pg/ml)			MPH	Number	TH levels (pg/ml)
	1	231.542				1	483.231				1	284.481
	2	236.805				2	464.656				2	425.339
	3	246.093				3	374.568				3	355.374
	4	161.887				4	397.787				4	327.512
Striatum
Normality Test (Shapiro-Wilk): Passed (P = 0.105)
Equal Variance Test: Passed (P = 0.666)
Source of Variation	DF	SS	MS	F	P
Between Groups	2	51302.4	25651.2	4.036	0.056
Residual	9	57202.4	6355.82
Total	11	108505
Group		Total n	Mean	SD	SE	C.I. of Mean (95%conf)	Median	0.25	0.75
Sham		4	455.205	97.458	48.729	155.077	468.841	390.825	519.585
tDCS-PFC		4	589.325	92.315	46.157	146.893	629.35	537.495	641.155
MPH		4	446.454	32.363	16.181	51.496	450.524	421.624	471.283
Source Data
Sham	Number	TH levels (pg/ml)			tDCS-PFC	Number	TH levels (pg/ml)			MPH	Number	TH levels (pg/ml)
	1	558.797				1	623.381				1	405.207
	2	324.342				2	451.61				2	463.007
	3	457.308				3	646.989				3	479.56
	4	480.374				4	635.32				4	438.042
Hippocampus
Normality Test (Shapiro-Wilk): Passed (P = 0.588)
Equal Variance Test: Failed (P < 0.050)
Group		Total n	Mean	SD	SE	C.I. of Mean (95%conf)	Median	0.25	0.75
Sham		4	348.564	41.726	20.863	66.394	345.003	315.284	381.843
tDCS-PFC		4	494.918	134.023	67.011	213.259	488.029	385.094	604.741
MPH		4	452.892	134.922	67.461	214.691	450.106	338.347	567.437
Source Data
Sham	Number	TH levels (pg/ml)			tDCS-PFC	Number	TH levels (pg/ml)			MPH	Number	TH levels (pg/ml)
	1	325.345				1	648.547				1	541.741
	2	305.222				2	560.936				2	593.132
	3	399.025				3	415.123				3	358.47
	4	364.662				4	355.065				4	318.225
SN/VTA
Normality Test (Shapiro-Wilk): Passed (P = 0.657)
Equal Variance Test: Failed (P < 0.050)
Group		Total n	Mean	SD	SE	C.I. of Mean (95%conf)	Median	0.25	0.75
Sham		4	793.252	368.649	184.324	586.6	774.121	488.379	1098.12
tDCS-PFC		4	1119.22	140.688	70.344	223.865	1083.74	1018.75	1219.69
MPH		4	1120.11	433.404	216.702	689.64	1165.42	761.638	1478.57
Source Data
Sham	Number	TH levels (pg/ml)			tDCS-PFC	Number	TH levels (pg/ml)			MPH	Number	TH levels (pg/ml)
	1	986.189				1	995.144				1	614.697
	2	1210.06				2	1314.26				2	1534.88
	3	414.705				3	1125.13				3	1422.26
	4	562.053				4	1042.36				4	908.58

## Sheet: Figure 2D
Figure 2D : Free mBDNF levels measured by ELISA at 8 days after HD-tDCS
Summary Statistics (arithmetic from Sigma Plot 11)
PFC
Normality Test (Shapiro-Wilk): Passed (P = 0.888)
Equal Variance Test: Passed (P = 0.444)
Source of Variation	DF	SS	MS	F	P
Between Groups	2	192726	96363	8.538	0.008
Residual	9	101576	11286.2
Total	11	294302
Group		Total n	Mean	SD	SE	C.I. of Mean (95%conf)	Median	0.25	0.75
Sham		4	245.163	36.228	18.114	57.646	235.95	223.607	266.72
tDCS-PFC		4	500.754	117.354	58.677	186.736	486.339	412.104	589.403
MPH		4	525.528	137.019	68.51	218.027	577.589	444.901	606.155
Source Data
Sham	Number	mBDNF levels (pg/ml)			tDCS-PFC	Number	mBDNF levels (pg/ml)			MPH	Number	mBDNF levels (pg/ml)
	1	296.784				1	445.254				1	623.876
	2	236.655				2	378.954				2	323.057
	3	211.969				3	527.423				3	566.745
	4	235.245				4	651.384				4	588.434
Striatum
Normality Test (Shapiro-Wilk): Passed (P = 0.190)
Equal Variance Test: Passed (P = 0.426)
Source of Variation	DF	SS	MS	F	P
Between Groups	2	480318	240159	17.204	<0.001
Residual	9	125638	13959.8
Total	11	605956
Group		Total n	Mean	SD	SE	C.I. of Mean (95%conf)	Median	0.25	0.75
Sham		4	875.659	112.083	56.041	178.348	863.775	781.493	969.825
tDCS-PFC		4	1361.81	167.555	83.778	266.617	1298.95	1265.31	1458.3
MPH		4	1065.21	35.244	17.622	56.081	1054.4	1042.63	1087.8
Source Data
Sham	Number	mBDNF levels (pg/ml)			tDCS-PFC	Number	mBDNF levels (pg/ml)			MPH	Number	mBDNF levels (pg/ml)
	1	773.044				1	1290.74				1	1116.07
	2	789.942				2	1609.44				2	1036
	3	1002.04				3	1239.89				3	1049.26
	4	937.607				4	1307.16				4	1059.53
Hippocampus
Normality Test (Shapiro-Wilk): Passed (P = 0.394)
Equal Variance Test: Passed (P = 0.989)
Source of Variation	DF	SS	MS	F	P
Between Groups	2	81368.7	40684.3	6.994	0.015
Residual	9	52350	5816.67
Total	11	133719
Group		Total n	Mean	SD	SE	C.I. of Mean (95%conf)	Median	0.25	0.75
Sham		4	877.13	58.31	29.155	92.784	877.703	828.507	925.753
tDCS-PFC		4	943.121	69.558	34.779	110.681	954.936	889.958	996.285
MPH		4	745.059	95.977	47.989	152.721	704.811	691.058	799.06
Source Data
Sham	Number	mBDNF levels (pg/ml)			tDCS-PFC	Number	mBDNF levels (pg/ml)			MPH	Number	mBDNF levels (pg/ml)
	1	842.702				1	927.516				1	682.594
	2	938.801				2	852.4				2	710.101
	3	814.312				3	982.355				3	888.018
	4	912.705				4	1010.22				4	699.522
SN/VTA
Normality Test (Shapiro-Wilk): Passed (P = 0.078)
Equal Variance Test: Passed (P = 0.373)
Source of Variation	DF	SS	MS	F	P
Between Groups	2	527121	263560	5.261	0.031
Residual	9	450874	50097.1
Total	11	977995
Group		Total n	Mean	SD	SE	C.I. of Mean (95%conf)	Median	0.25	0.75
Sham		4	1083.86	351.262	175.631	558.934	1178.33	860.839	1306.88
tDCS-PFC		4	1550.65	82.778	41.389	131.718	1568.2	1491.78	1609.53
MPH		4	1502.32	141.614	70.807	225.338	1545.09	1416.54	1588.11
Source Data
Sham	Number	mBDNF levels (pg/ml)			tDCS-PFC	Number	mBDNF levels (pg/ml)			MPH	Number	mBDNF levels (pg/ml)
	1	1396.46				1	1590.13				1	1297.27
	2	1217.3				2	1628.93				2	1554.37
	3	582.316				3	1546.27				3	1535.81
	4	1139.36				4	1437.29				4	1621.85
