# Supplementary material for: Therapeutic effects of anodal transcranial direct current stimulation in a rat model of ADHD
Source: eLife journal article supplement (doi:10.7554/elife.56359), 2020-09-21
Supplement: supp [file Figure 3-figure supplement 1.xlsx]

## Sheet: Suppl 3-suppl 1B
Figure 3-Supplementary Figure 1B : iba-1-positive cells
Summary Statistics (arithmetic from Sigma Plot 11)
Normality Test (Shapiro-Wilk): Passed (P = 0.179)
Equal Variance Test: Passed (P = 0.731)
Source of Variation	DF	SS	MS	F	P
Between Groups	5	2522	504.4	9.067	<0.001
Residual	24	1335.2	55.633
Total	29	3857.2
Group		Total n	Mean	SD	SE	C.I. of Mean (95%conf)	Median	0.25	0.75
WKY-PFC		5	47.2	7.155	3.2	8.885	50	41	51.5
SHR-PFC		5	70.4	9.154	4.094	11.366	75	60.75	77.5
SHR-tDCS-PFC		5	59.4	4.506	2.015	5.594	60	56	63.25
WKY-M1		5	43	7.906	3.536	9.816	44	39.75	48
SHR-M1		5	57.6	8.62	3.855	10.703	60	49.5	63
SHR-tDCS-M1		5	48.8	6.458	2.888	8.018	47	44.75	53.5
Source Data
WKY-PFC	Number	Number of cells (n)			SHR-PFC	Number	Number of cells (n)			SHR-tDCS-PFC	Number	Number of cells (n)
	1	42				1	79				1	60
	2	50				2	77				2	53
	3	38				3	61				3	57
	4	56				4	75				4	63
	5	50				5	60				5	64
WKY-M1	Number	Number of cells (n)			SHR-M1	Number	Number of cells (n)			SHR-tDCS-M1	Number	Number of cells (n)
	1	30				1	69				1	52
	2	44				2	61				2	58
	3	47				3	50				3	46
	4	51				4	60				4	41
	5	43				5	48				5	47
