# Supplementary material for: Therapeutic effects of anodal transcranial direct current stimulation in a rat model of ADHD
Source: eLife journal article supplement (doi:10.7554/elife.56359), 2020-09-21
Supplement: supp [file Figure 3-figure supplement 2.xlsx]

## Sheet: Sheet1
Figure 3-Supplementary Figure 2B : IOD of TH/DAT cells
Summary Statistics (arithmetic from Sigma Plot 11)
Dorsomedial VTA (dmVTA)
Normality Test (Shapiro-Wilk): Passed (P = 0.281)
Equal Variance Test: Passed (P = 0.898)
Source of Variation	DF	SS	MS	F	P
Between Groups	2	1416.93	708.467	2.685	0.109
Residual	12	3166	263.833
Total	14	4582.93
Group		Total n	Mean	SD	SE	C.I. of Mean (95%conf)	Median	0.25	0.75
Sham		5	0.883	0.728	0.325	0.904	1.242	0.142	1.46
tDCS-PFC		5	1.593	2.322	1.038	2.883	0.378	0.254	2.562
MPH		5	4.349	8.065	3.607	10.014	0.13	0.007	6.91
Source Data
Sham	Number	IOD			tDCS-PFC	Number	IOD			MPH	Number	IOD
	1	1.242				1	0.123				1	0.13
	2	0.187				2	1.541				2	0.009
	3	0.008				3	0.378				3	0.001
	4	1.432				4	5.624				4	18.591
	5	1.545				5	0.298				5	3.016
Ventromedial VTA (vmVTA)
Normality Test (Shapiro-Wilk): Failed (P < 0.050)
Equal Variance Test: Passed (P = 0.370)
Source of Variation	DF	SS	MS	F	P
Between Groups	2	10.439	5.22	1.334	0.3
Residual	12	46.944	3.912
Total	14	57.383
Group		Total n	Mean	SD	SE	C.I. of Mean (95%conf)	Median	0.25	0.75
Sham		5	2.444	1.845	0.825	2.29	2.329	0.875	4.138
tDCS-PFC		5	0.414	0.296	0.133	0.368	0.368	0.196	0.573
MPH		5	1.627	2.872	1.284	3.565	0.008	0.00375	2.774
Source Data
Sham	Number	IOD			tDCS-PFC	Number	IOD			MPH	Number	IOD
	1	1.086				1	0.219				1	0.004
	2	0.244				2	0.888				2	0.003
	3	2.329				3	0.368				3	0.008
	4	3.995				4	0.468				4	6.634
	5	4.567				5	0.125				5	1.487
Dorsolateral VTA (dlVTA)
Normality Test (Shapiro-Wilk): Passed (P = 0.062)
Equal Variance Test: Passed (P = 0.144)
Source of Variation	DF	SS	MS	F	P
Between Groups	2	1368.43	684.214	5.624	0.019
Residual	12	1459.94	121.661
Total	14	2828.36
Group		Total n	Mean	SD	SE	C.I. of Mean (95%conf)	Median	0.25	0.75
Sham		5	24.65	16.44	7.352	20.413	25.797	12.77	32.769
tDCS-PFC		5	1.648	1.773	0.793	2.201	1.079	0.0675	3.328
MPH		5	9.447	9.569	4.279	11.882	5.493	4.398	12.813
Source Data
Sham	Number	IOD			tDCS-PFC	Number	IOD			MPH	Number	IOD
	1	15.172				1	1.079				1	5.164
	2	5.565				2	3.142				2	2.098
	3	27.18				3	3.886				3	5.493
	4	49.536				4	0.063				4	26.095
	5	25.797				5	0.069				5	8.386
Ventrolateral VTA (vlVTA)
Normality Test (Shapiro-Wilk): Passed (P = 0.155)
Equal Variance Test: Passed (P = 0.090)
Source of Variation	DF	SS	MS	F	P
Between Groups	2	396.726	198.363	4.302	0.039
Residual	12	553.343	46.112
Total	14	950.069
Group		Total n	Mean	SD	SE	C.I. of Mean (95%conf)	Median	0.25	0.75
Sham		5	12.968	9.993	4.469	12.408	9.129	6.854	21.157
tDCS-PFC		5	0.373	0.325	0.145	0.403	0.347	0.0892	0.601
MPH		5	6.876	6.194	2.77	7.691	5.436	2.753	9.595
Source Data
Sham	Number	IOD			tDCS-PFC	Number	IOD			MPH	Number	IOD
	1	9.129				1	0.051				1	17.279
	2	1.023				2	0.845				2	7.033
	3	8.797				3	0.519				3	1.439
	4	26.52				4	0.347				4	3.191
	5	19.37				5	0.102				5	5.436
