# Supplementary material for: Therapeutic effects of anodal transcranial direct current stimulation in a rat model of ADHD
Source: eLife journal article supplement (doi:10.7554/elife.56359), 2020-09-21
Supplement: supp [file Figure 3.xlsx]

## Sheet: Figure 3E
Figure 3E : IOD in the mPFC
Summary Statistics (arithmetic from Sigma Plot 11)
TH
Normality Test (Shapiro-Wilk): Passed (P = 0.829)
Equal Variance Test: Passed (P = 0.630)
Source of Variation	DF	SS	MS	F	P
Between Groups	2	399.047	199.524	6.273	0.014
Residual	12	381.672	31.806
Total	14	780.719
Group		Total n	Mean	SD	SE	C.I. of Mean (95%conf)	Median	0.25	0.75
Sham		5	19.83	6.91	3.09	8.58	16.765	14.997	26.173
tDCS-PFC		5	30.744	4.694	2.099	5.829	31.003	27.589	33.612
MPH		5	30.798	5.063	2.264	6.287	32.188	28.223	33.69
Source Data
Sham	Number	IOD			tDCS-PFC	Number	IOD			MPH	Number	IOD
	1	25.288				1	24.483				1	22.647
	2	16.765				2	31.003				2	32.844
	3	28.827				3	32.419				3	36.227
	4	12.407				4	37.192				4	30.082
	5	15.861				5	28.624				5	32.188
DAT
Normality Test (Shapiro-Wilk): Failed (P < 0.050)
Group		Total n	Mean	SD	SE	C.I. of Mean (95%conf)	Median	0.25	0.75
Sham		5	95.625	5.593	2.501	6.945	94.31	91.881	98.951
tDCS-PFC		5	52.129	20.248	9.055	25.141	57.614	44.397	64.7
MPH		5	85.256	8.667	3.876	10.761	84.854	80.191	92.112
Source Data
Sham	Number	IOD			tDCS-PFC	Number	IOD			MPH	Number	IOD
	1	89.674				1	53.378				1	72.473
	2	97.142				2	63.302				2	82.763
	3	94.31				3	57.614				3	84.854
	4	92.617				4	68.895				4	91.129
	5	104.38				5	17.455				5	95.063
TH/DAT
Normality Test (Shapiro-Wilk): Passed (P = 0.145)
Equal Variance Test: Passed (P = 0.781)
Source of Variation	DF	SS	MS	F	P
Between Groups	2	1.284	0.642	4.599	0.033
Residual	12	1.675	0.14
Total	14	2.959
Group		Total n	Mean	SD	SE	C.I. of Mean (95%conf)	Median	0.25	0.75
Sham		5	0.913	0.312	0.14	0.387	1.03	0.653	1.1
tDCS-PFC		5	0.489	0.349	0.156	0.434	0.395	0.308	0.596
MPH		5	1.201	0.446	0.2	0.554	1.025	0.87	1.498
Source Data
Sham	Number	IOD			tDCS-PFC	Number	IOD			MPH	Number	IOD
	1	1.03				1	0.177				1	1.908
	2	0.703				2	0.351				2	0.827
	3	1.298				3	0.432				3	1.361
	4	0.502				4	1.089				4	1.025
	5	1.034				5	0.395				5	0.884

## Sheet: Figure 3F
Figure 3F : IOD in the striatum
Summary Statistics (arithmetic from Sigma Plot 11)
Dorsal striatum
TH
Normality Test (Shapiro-Wilk): Passed (P = 0.758)
Equal Variance Test: Passed (P = 0.187)
Source of Variation	DF	SS	MS	F	P
Between Groups	2	941.184	470.592	7.667	0.007
Residual	12	736.513	61.376
Total	14	1677.7
Group		Total n	Mean	SD	SE	C.I. of Mean (95%conf)	Median	0.25	0.75
Sham		5	36.916	11.247	5.03	13.966	37.817	30.613	43.921
tDCS-PFC		5	54.506	4.158	1.859	5.163	55.158	53.168	56.36
MPH		5	52.804	6.351	2.84	7.886	51.509	46.988	59.403
Source Data
Sham	Number	IOD			tDCS-PFC	Number	IOD			MPH	Number	IOD
	1	20.186				1	55.158				1	46.494
	2	50.895				2	55.402				2	59.495
	3	37.817				3	47.77				3	59.372
	4	34.088				4	59.232				4	51.509
	5	41.596				5	54.967				5	47.152
DAT
Normality Test (Shapiro-Wilk): Passed (P = 0.980)
Equal Variance Test: Failed (P < 0.050)
Group		Total n	Mean	SD	SE	C.I. of Mean (95%conf)	Median	0.25	0.75
Sham		5	32.734	3.042	1.36	3.777	31.637	30.343	35.544
tDCS-PFC		5	13.246	2.12	0.948	2.632	12.841	11.647	14.249
MPH		5	30.34	6.61	2.956	8.207	31.588	23.901	35.57
Source Data
Sham	Number	IOD			tDCS-PFC	Number	IOD			MPH	Number	IOD
	1	29.606				1	11.523				1	24.209
	2	36.671				2	12.841				2	34.677
	3	30.589				3	16.765				3	22.975
	4	35.169				4	13.411				4	31.588
	5	31.637				5	11.688				5	38.25
TH/DAT
Normality Test (Shapiro-Wilk): Failed (P < 0.050)
Group		Total n	Mean	SD	SE	C.I. of Mean (95%conf)	Median	0.25	0.75
Sham		5	12.758	9.673	4.326	12.01	10.451	6.795	15.729
tDCS-PFC		5	4.821	3.789	1.695	4.705	3.452	2.221	7.216
MPH		5	6.164	3.842	1.718	4.771	6.426	4.227	8.774
Source Data
Sham	Number	IOD			tDCS-PFC	Number	IOD			MPH	Number	IOD
	1	5.411				1	1.26				1	5.585
	2	10.451				2	3.452				2	6.426
	3	7.256				3	2.541				3	8.219
	4	29.551				4	10.844				4	0.152
	5	11.121				5	6.007				5	10.44
Ventral striatum
TH
Normality Test (Shapiro-Wilk): Passed (P = 0.081)
Equal Variance Test: Passed (P = 0.991)
Source of Variation	DF	SS	MS	F	P
Between Groups	2	2069.78	1034.89	21.182	<0.001
Residual	12	586.282	48.857
Total	14	2656.06
Group		Total n	Mean	SD	SE	C.I. of Mean (95%conf)	Median	0.25	0.75
Sham		5	44.761	8.051	3.601	9.997	45.519	41.539	50.363
tDCS-PFC		5	71.361	6.405	2.864	7.953	75.255	65.061	76.155
MPH		5	48.559	6.381	2.854	7.924	50.749	42.876	53.344
Source Data
Sham	Number	IOD			tDCS-PFC	Number	IOD			MPH	Number	IOD
	1	44.916				1	76.709				1	40.146
	2	31.409				2	65.688				2	55.484
	3	52.215				3	75.97				3	52.631
	4	49.746				4	75.255				4	43.786
	5	45.519				5	63.181				5	50.749
DAT
Normality Test (Shapiro-Wilk): Passed (P = 0.764)
Equal Variance Test: Passed (P = 0.354)
Source of Variation	DF	SS	MS	F	P
Between Groups	2	97.034	48.517	0.698	0.517
Residual	12	834.641	69.553
Total	14	931.675
Group		Total n	Mean	SD	SE	C.I. of Mean (95%conf)	Median	0.25	0.75
Sham		5	32.367	7.289	3.26	9.051	31.463	25.904	37.507
tDCS-PFC		5	26.526	5.12	2.29	6.357	25.932	23.262	31.383
MPH		5	27.569	11.372	5.086	14.12	33.272	16.543	35.415
Source Data
Sham	Number	IOD			tDCS-PFC	Number	IOD			MPH	Number	IOD
	1	25.639				1	31.344				1	72.473
	2	43.094				2	31.499				2	82.763
	3	31.463				3	25.932				3	84.854
	4	35.645				4	19.258				4	91.129
	5	25.992				5	24.597				5	95.063
TH/DAT
Normality Test (Shapiro-Wilk): Passed (P = 0.909)
Equal Variance Test: Failed (P < 0.050)
Group		Total n	Mean	SD	SE	C.I. of Mean (95%conf)	Median	0.25	0.75
Sham		5	15.81	5.744	2.569	7.132	14.681	11.08	21.579
tDCS-PFC		5	3.195	0.654	0.292	0.812	2.782	2.711	3.877
MPH		5	4.318	2.988	1.336	3.71	5.136	1.561	6.934
Source Data
Sham	Number	IOD			tDCS-PFC	Number	IOD			MPH	Number	IOD
	1	9.205				1	2.732				1	0.499
	2	14.681				2	3.847				2	6.846
	3	11.705				3	2.782				3	1.915
	4	22.027				4	2.646				4	5.136
	5	21.43				5	3.969				5	7.196

## Sheet: Figure 3G
Figure 3G : IOD in the dosal hippocampus (CA1)
Summary Statistics (arithmetic from Sigma Plot 11)
TH
Normality Test (Shapiro-Wilk): Passed (P = 0.231)
Equal Variance Test: Passed (P = 0.686)
Source of Variation	DF	SS	MS	F	P
Between Groups	2	60.563	30.282	8.988	0.004
Residual	12	40.43	3.369
Total	14	100.993
Group		Total n	Mean	SD	SE	C.I. of Mean (95%conf)	Median	0.25	0.75
Sham		5	16.558	0.788	0.352	0.978	16.602	15.916	17.295
tDCS-PFC		5	19.218	2.478	1.108	3.077	18.374	17.94	19.765
MPH		5	14.302	1.83	0.818	2.272	15.208	12.74	15.671
Source Data
Sham	Number	IOD			tDCS-PFC	Number	IOD			MPH	Number	IOD
	1	16.049				1	17.561				1	11.696
	2	17.278				2	18.486				2	15.584
	3	16.602				3	23.604				3	13.088
	4	17.345				4	18.066				4	15.933
	5	15.517				5	18.374				5	15.208
DAT
Normality Test (Shapiro-Wilk): Passed (P = 0.111)
Equal Variance Test: Passed (P = 0.614)
Source of Variation	DF	SS	MS	F	P
Between Groups	2	99.028	49.514	1.322	0.303
Residual	12	449.563	37.464
Total	14	548.591
Group		Total n	Mean	SD	SE	C.I. of Mean (95%conf)	Median	0.25	0.75
Sham		5	28.724	3.617	1.618	4.491	26.296	26.095	32.135
tDCS-PFC		5	25.085	6.797	3.04	8.44	26.902	21.643	29.392
MPH		5	31.351	7.287	3.259	9.049	34.954	25.114	37.082
Source Data
Sham	Number	IOD			tDCS-PFC	Number	IOD			MPH	Number	IOD
	1	33.572				1	31.756				1	34.954
	2	31.656				2	28.604				2	36.99
	3	25.953				3	13.957				3	26.499
	4	26.296				4	26.902				4	37.357
	5	26.142				5	24.205				5	20.957
TH/DAT
Normality Test (Shapiro-Wilk): Passed (P = 0.084)
Equal Variance Test: Passed (P = 0.405)
Source of Variation	DF	SS	MS	F	P
Between Groups	2	0.0315	0.0158	1.757	0.214
Residual	12	0.108	0.00898
Total	14	0.139
Group		Total n	Mean	SD	SE	C.I. of Mean (95%conf)	Median	0.25	0.75
Sham		5	0.156	0.083	0.0371	0.103	0.132	0.106	0.186
tDCS-PFC		5	0.263	0.0437	0.0196	0.0543	0.248	0.233	0.307
MPH		5	0.178	0.135	0.0602	0.167	0.126	0.0883	0.261
Source Data
Sham	Number	IOD			tDCS-PFC	Number	IOD			MPH	Number	IOD
	1	1.03				1	0.177				1	1.908
	2	0.703				2	0.351				2	0.827
	3	1.298				3	0.432				3	1.361
	4	0.502				4	1.089				4	1.025
	5	1.034				5	0.395				5	0.884

## Sheet: Figure 3H
Figure 3H : IOD in the SN/VTA
Summary Statistics (arithmetic from Sigma Plot 11)
Substantia nigra
TH
Normality Test (Shapiro-Wilk): Passed (P = 0.709)
Equal Variance Test: Passed (P = 0.161)
Source of Variation	DF	SS	MS	F	P
Between Groups	2	1670.71	835.354	1.819	0.204
Residual	12	5509.72	459.143
Total	14	7180.43
Group		Total n	Mean	SD	SE	C.I. of Mean (95%conf)	Median	0.25	0.75
Sham		5	70.972	11.992	5.363	14.89	71.779	61.644	79.13
tDCS-PFC		5	94.98	23.98	10.724	29.775	99.588	73.709	112.244
MPH		5	74.674	25.663	11.477	31.865	68.151	56.193	99.905
Source Data
Sham	Number	IOD			tDCS-PFC	Number	IOD			MPH	Number	IOD
	1	55.902				1	65.841				1	42.819
	2	71.779				2	99.588				2	60.651
	3	63.558				3	76.331				3	68.151
	4	87.174				4	107.917				4	98.936
	5	76.449				5	125.224				5	102.812
DAT
Normality Test (Shapiro-Wilk): Passed (P = 0.114)
Equal Variance Test: Passed (P = 0.898)
Source of Variation	DF	SS	MS	F	P
Between Groups	2	12221.1	6110.57	11.406	0.002
Residual	12	6428.83	535.736
Total	14	18650
Group		Total n	Mean	SD	SE	C.I. of Mean (95%conf)	Median	0.25	0.75
Sham		5	121.011	24.757	11.072	30.739	114.836	103.963	132.292
tDCS-PFC		5	51.101	25.644	11.468	31.841	55.323	27.924	64.049
MPH		5	86.967	18.35	8.206	22.784	83.488	71.949	103.047
Source Data
Sham	Number	IOD			tDCS-PFC	Number	IOD			MPH	Number	IOD
	1	100.215				1	26.75				1	66.476
	2	122.188				2	55.538				2	100.543
	3	162.604				3	55.323				3	83.488
	4	105.212				4	28.315				4	73.773
	5	114.836				5	89.581				5	110.557
TH/DAT
Normality Test (Shapiro-Wilk): Passed (P = 0.163)
Equal Variance Test: Passed (P = 0.271)
Source of Variation	DF	SS	MS	F	P
Between Groups	2	1125.11	562.553	6.015	0.016
Residual	12	1122.31	93.526
Total	14	2247.42
Group		Total n	Mean	SD	SE	C.I. of Mean (95%conf)	Median	0.25	0.75
Sham		5	23.755	10.3	4.606	12.789	17.223	16.919	30.997
tDCS-PFC		5	3.027	3.227	1.443	4.007	1.531	0.324	6.414
MPH		5	17.301	12.809	5.728	15.905	12.46	6.387	29.548
Source Data
Sham	Number	IOD			tDCS-PFC	Number	IOD			MPH	Number	IOD
	1	16.435				1	0.212				1	6.634
	2	17.081				2	1.531				2	5.646
	3	17.223				3	6.313				3	12.46
	4	40.056				4	0.362				4	28.212
	5	27.978				5	6.715				5	33.555
Ventral tengmental area
TH
Normality Test (Shapiro-Wilk): Passed (P = 0.647)
Equal Variance Test: Failed (P < 0.050)
Group		Total n	Mean	SD	SE	C.I. of Mean (95%conf)	Median	0.25	0.75
Sham		5	64.282	4.587	2.051	5.695	66.137	62.975	66.615
tDCS-PFC		5	84.328	26.843	12.005	33.33	80.272	63.081	107.666
MPH		5	76.837	13.651	6.105	16.95	71.036	67.883	85.108
Source Data
Sham	Number	IOD			tDCS-PFC	Number	IOD			MPH	Number	IOD
	1	65.231				1	52.445				1	71.036
	2	66.137				2	66.626				2	98.974
	3	66.312				3	104.182				3	68.922
	4	67.523				4	118.117				4	80.486
	5	56.208				5	80.272				5	64.765
DAT
Normality Test (Shapiro-Wilk): Passed (P = 0.168)
Equal Variance Test: Passed (P = 0.913)
Source of Variation	DF	SS	MS	F	P
Between Groups	2	5155.95	2577.97	7.874	0.007
Residual	12	3928.82	327.402
Total	14	9084.77
Group		Total n	Mean	SD	SE	C.I. of Mean (95%conf)	Median	0.25	0.75
Sham		5	77.628	19.864	8.884	24.665	69.639	64.472	93.298
tDCS-PFC		5	32.392	15.81	7.07	19.63	41.367	17.376	43.4
MPH		5	58.483	18.376	8.218	22.816	52.904	44.236	77.422
Source Data
Sham	Number	IOD			tDCS-PFC	Number	IOD			MPH	Number	IOD
	1	106.139				1	11.8				1	52.904
	2	67.272				2	19.234				2	78.299
	3	69.639				3	47.537				3	37.653
	4	89.018				4	42.021				4	46.43
	5	56.071				5	41.367				5	77.129
TH/DAT
Normality Test (Shapiro-Wilk): Passed (P = 0.078)
Equal Variance Test: Passed (P = 0.209)
Source of Variation	DF	SS	MS	F	P
Between Groups	2	670.207	335.104	9.477	0.003
Residual	12	424.324	35.36
Total	14	1094.53
Group		Total n	Mean	SD	SE	C.I. of Mean (95%conf)	Median	0.25	0.75
Sham		5	16.316	8.78	3.926	10.902	15.326	12.256	21.433
tDCS-PFC		5	0.793	0.861	0.385	1.07	0.434	0.131	1.402
MPH		5	4.046	5.315	2.377	6.6	1.168	0.595	6.993
Source Data
Sham	Number	IOD			tDCS-PFC	Number	IOD			MPH	Number	IOD
	1	19.177				1	0.097				1	5.006
	2	28.199				2	0.142				2	12.954
	3	15.071				3	1.158				3	0.462
	4	15.326				4	2.134				4	0.639
	5	3.809				5	0.434				5	1.168
